# Supplementary material for: Flavonoid-Rich Foods, Dementia Risk, and Interactions With Genetic Risk, Hypertension, and Depression
Source: PubMed Central journal article supplement (PMC11411383; doi:10.1001/jamanetworkopen.2024.34136), 2024-09-18
Supplement: jamanetwopen-e2434136-s001.pdf [file jamanetwopen-e2434136-s001.pdf]

## Supplemental Online Content

Jennings A, Thompson AS, Tresserra-Rimbau A, et al. Flavonoid-rich foods, dementia risk, and interactions with genetic risk, hypertension, and depression. *JAMA Netw Open*. 2024;7(9):e2434136. doi:10.1001/jamanetworkopen.2024.34136

**eMethods 1.** Flavonoid Subclasses

**eMethods 2.** Healthy Plant-Based Diet Index

**eMethods 3.** Genetic Risk

**eMethods 4.** Covariate Assessment

**eFigure 1.** Flowchart of Participants in the UK Biobank Study

**eFigure 2.** Age- and Sex-Adjusted Kaplan-Meier Survival Curves in All Participants and Stratified by Subgroup in 121 986 Males and Females From the UK Biobank

**eFigure 3.** Risk of Dementia by the Number of Components Met of Tea Intake of  $\geq 5$  Servings/d, Red Wine Intake  $\geq 1$  Serving/d, and Berry Intake  $\geq 0.5$  Servings/d in 121 986 Males and Females From the UK Biobank

**eTable 1.** *International Classification of Diseases* Codes Used for Ascertainment of Dementia

**eTable 2.** Percent Contribution of Flavonoid-Rich Foods and the Flavodiet Score to Intake of Flavonoid Subclasses in 121 986 Males and Females From the UK Biobank

**eTable 3.** Baseline Characteristics by Inclusion Status in 502 411 Males and Females From the UK Biobank

**eTable 4.** Baseline Characteristics and Dietary Intakes by Dementia Diagnosis in 121 986 Males and Females From the UK Biobank

**eTable 5.** Estimated Hazard Ratios for LASSO Cox Regression Between Risk of Dementia and Flavodiet Score in 121 986 Males and Females From the UK Biobank

**eTable 6.** Risk of Dementia by Quintiles of Flavodiet Score After Removing Each Food From the Final Score in 121 986 Males and Females From the UK Biobank

**eTable 7.** Risk of Dementia by Quintiles of Flavodiet Score and Flavonoid Subclass Intake in 121 986 Males and Females From the UK Biobank, Stratified by Genetic Risk

**eTable 8.** Risk of Dementia by Quintiles of Flavodiet Score and Flavonoid Subclass Intake in 121 105 Males and Females From the UK Biobank, Stratified by Depression Status

**eTable 9.** Risk of Dementia by Quintiles of Flavodiet Score and Flavonoid Subclass Intake in 121 981 Males and Females From the UK Biobank, Stratified by Hypertension Status

**eTable 10.** Risk of Dementia by Quintiles of Flavodiet Score and Flavonoid Subclass Intake in 61 719 Males and Females Aged More Than 60 Years From the UK Biobank

**eTable 11.** Risk of Dementia by Quintiles of Flavodiet Score and Flavonoid Subclass Intake in 120 959 Males and Females With at Least 5 Years Follow-Up From the UK Biobank

**eTable 12.** Risk of Dementia by Quintiles of Flavodiet Score and Flavonoid Subclass Intake in 119 053 Males and Females With No Reported Stroke History From the UK Biobank

**eTable 13.** Risk of Dementia by Quintiles of Flavodiet Score and Flavonoid Subclass Intake in 35 110 Males and Females At High Genetic Risk of Dementia Whose Reported Ethnicity Was White From the UK Biobank

**eTable 14.** Risk of Dementia by Quintiles of Flavodiet Score and Flavonoid Subclass Intake in 121 986 Males and Females From the UK Biobank Adjusted for Individual Foods Associated With Dementia Risk)

**eTable 15.** Risk of Dementia by Quintiles of Flavodiet Score and Flavonoid Subclass Intake in 53 101 Males and Females From the UK Biobank Living in High Areas of Deprivation or With Low Levels of Education

**eTable 16.** Risk of Dementia by Quintiles of Flavodiet Score and Flavonoid Subclass Intake in 73 200 Males and Females From the UK Biobank With Low or Moderate Levels of Physical Activity

#### **eReferences**

This supplemental material has been provided by the authors to give readers additional information about their work.

## **eMethods 1. Flavonoid Subclasses**

Intakes were derived for the main subclasses of flavonoids habitually consumed: flavanones (eriodictyol, hesperetin, and naringenin), anthocyanins (cyanidin, delphinidin, malvidin, pelargonidin, petunidin, and peonidin), flavan-3-ols (catechins and epicatechins), flavonols (quercetin, kaempferol, myricetin, and isohamnetin), flavones (luteolin and apigenin), polymers (including proanthocyanidins [excluding monomers], theaflavins, and thearubigins), and proanthocyanidins separately (dimers, trimers, 4–6mers, 7–10mers, polymers, and monomers). Total flavonoid intakes were calculated by summing the 6 component subclasses (flavanones, anthocyanins, flavan-3-ols, flavonols, flavones, and polymers).

## **eMethods 2. Healthy Plant-Based Diet Index**

The healthy plant-based diet index (hPDI), made up of 17 food groups: whole grains, fruits, vegetables, nuts, legumes and vegetarian protein alternatives, tea and coffee, fruit juices, refined grains, potatoes, sugar-sweetened beverages, sweets and desserts, animal fat, dairy, eggs, fish or seafood, meat, and miscellaneous animal-derived foods, was derived. as previously described <sup>1</sup>

### **eMethods 3. Genetic Risk**

Genotyping was assayed using the UK BiLEVE Axiom (Affymetrix) and the UK Biobank Axiom arrays (Applied Biosystems)<sup>2</sup>. Imputed genotypes were derived from the Haplotype Reference Consortium and UK10K haplotype resource using computationally efficient methods. The APOE single-nucleotide polymorphisms were directly genotyped by rs429358 and rs7412. A polygenic risk score (PRS) was constructed to capture an individual's load of common genetic variants associated with Alzheimer's disease-related genetic risk in UK Biobank; full details of the methods and the selected SNPs have previously been published<sup>3</sup>. This polygenic risk score was categorized into low (lowest quintile), intermediate (quintiles 2 to 4), and high (highest quintile) risk groups, a routinely used approach for modelling polygenic risk scores in UK Biobank studies<sup>4</sup>.

## **eMethods 4. Covariate Assessment**

Participants completed a touchscreen questionnaire and a verbal interview conducted by trained staff and provided physical measurements and biological samples at baseline. At these assessments data were collected on age, sex, ethnicity, socioeconomic status, education, smoking status, sleep duration, physical activity, BMI, family history of dementia, post-menopausal status, number of self-reported medications and number of long-term health conditions.

History of stroke was defined for participants with a primary or secondary diagnosis of stroke, identified from hospital records or death registries using ICD codes I60, I61, I63 and I64, prior to diagnosis of dementia or end of follow-up. Current depressive symptoms at baseline were measured based on the frequency of four items from the Patient Health Questionnaire: 1) depressed mood, 2) disinterest or absence of enthusiasm, 3) tenseness or restlessness, and 4) tiredness or lethargy, with one point awarded if participants reported symptoms in the previous two weeks. The subsequent depressive symptoms score ranged from 0 to 4 for each participant with depression defined for scores  $>2$ <sup>5</sup>.

Systolic blood pressure and diastolic blood pressure were measured twice by using a digital sphygmomanometer (Omron 705 IT; OMRON Healthcare Europe B.V.) with the participants at rest in the seated position for at least five minutes and a one-minute interval between measurements. Hypertension was defined if systolic blood pressure was  $>140$  and/ or diastolic blood pressure  $>90$  and/ or self-reported use of blood pressure medication. For participants, without these data (n=6874) we used a self-reported diagnosis by a medical professional.

### eFigure1. Flowchart of Participants in the UK Biobank Study

<sup>1</sup> Incidence rate per 1000 person-years

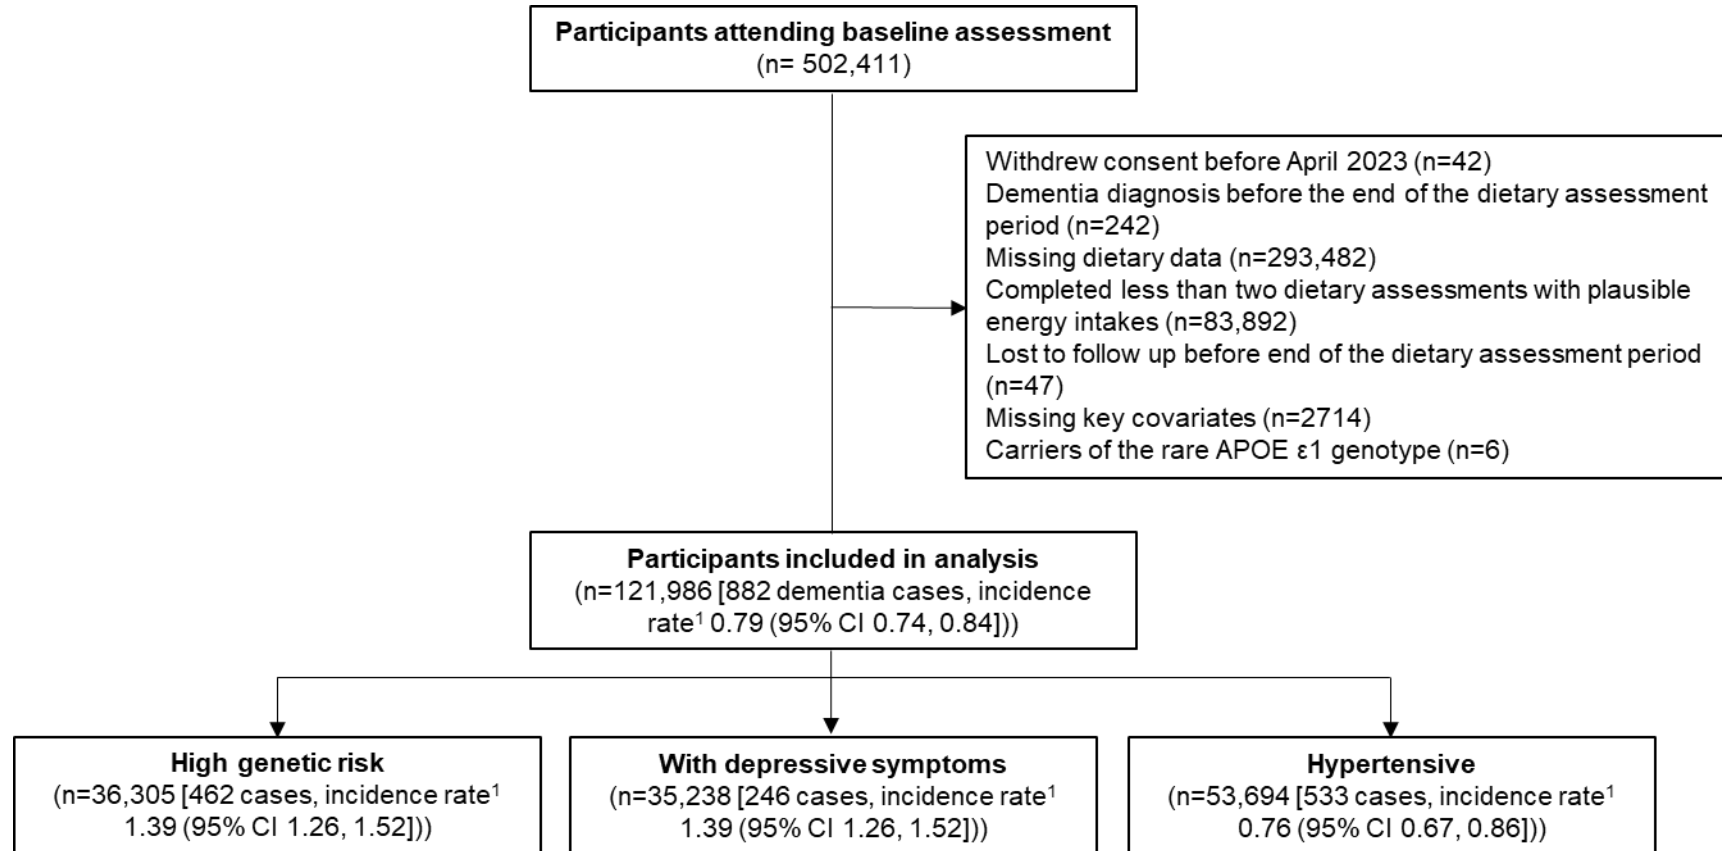

**eFigure 2: Age- and Sex-Adjusted Kaplan-Meier Survival Curves in All Participants and Stratified by Subgroup in 121 986 Males and Females From the UK Biobank**

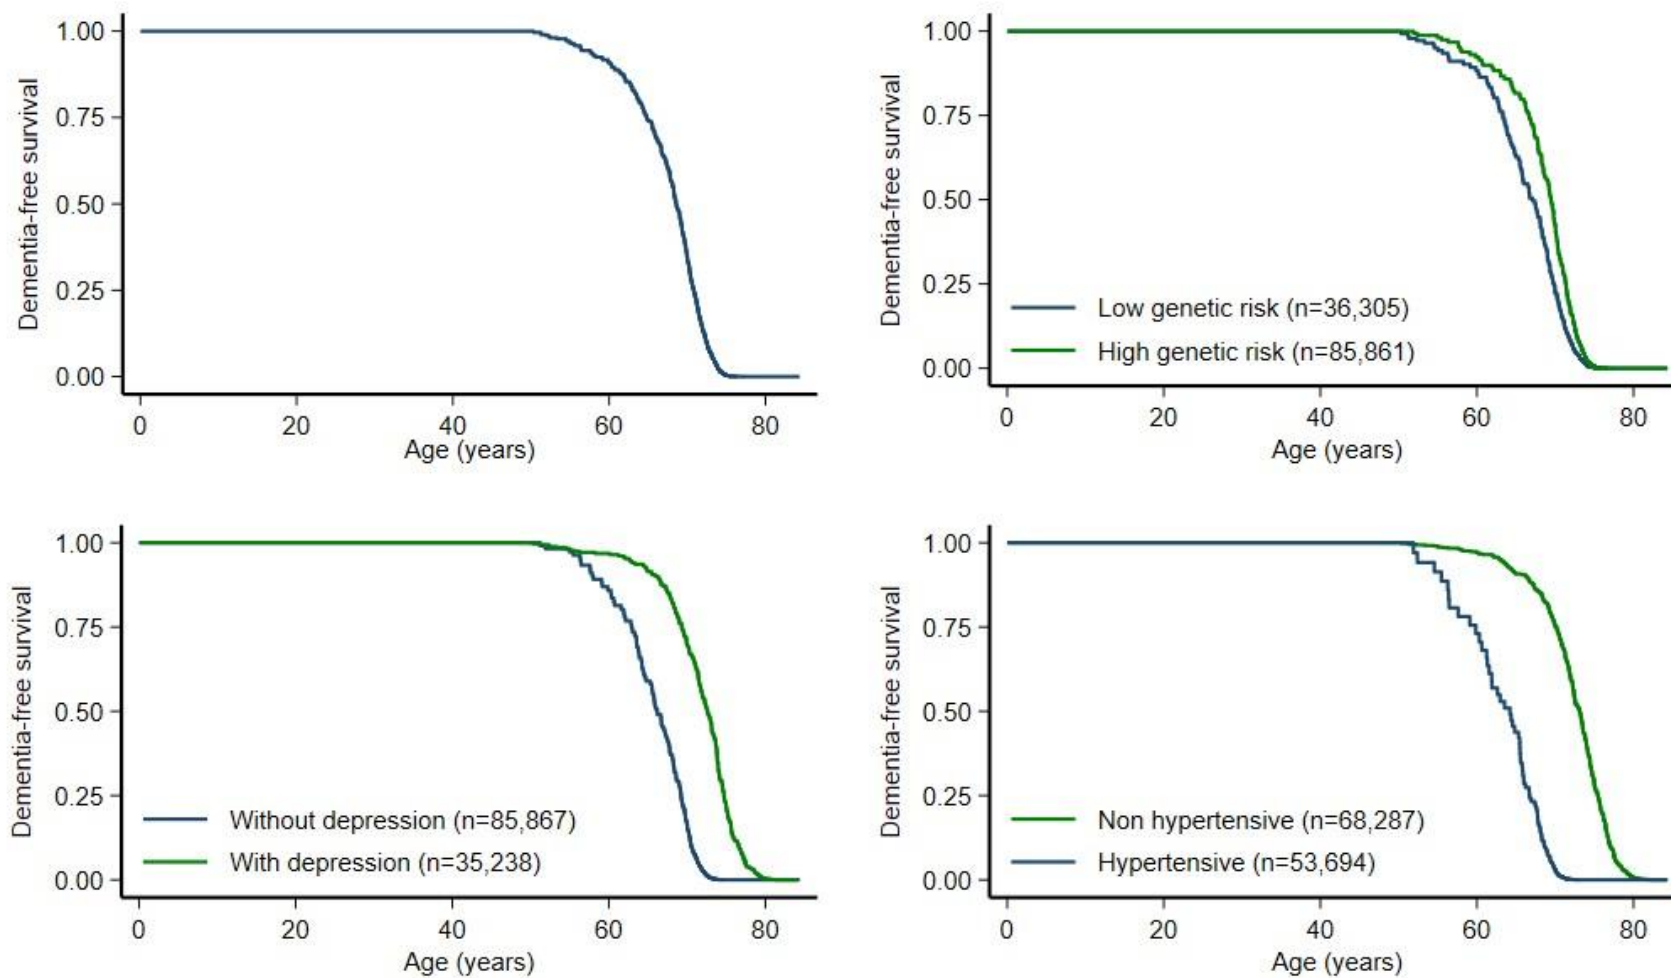



### eFigure 3. Risk of Dementia by the Number of Components Met of Tea Intake of $\geq 5$ Servings/d, Red Wine Intake $\geq 1$ Serving/d, and Berry Intake $\geq 0.5$ Servings/d in 121 986 Males and Females From the UK Biobank

Values are adjusted hazard ratios (95% CI), n=121,986 (882 cases). Foods were identified as those in the flavodiet score significantly associated with reduced dementia risk. The number of ideal servings were defined from the median intake of tea, red wine, and berries in those participants in the highest quintile of all three foods (n=1297). Model adjusted for sex (male or female), socioeconomic status (Townsend Index, categorised as low [quintile 1], moderate [quintiles 2–4], high [quintile 5] deprivation), highest level of education (higher, vocational, upper Secondary, lower Secondary, none or unknown), ethnicity (White, Mixed, Asian, Black, Chinese, other group, not answered), current smoking status (yes or no), typical sleep duration ( $\leq 6$  hours, 7–8 hours or  $> 8$  hours, not answered), physical activity (total excess metabolic equivalents, in quintiles), BMI (kg/m<sup>2</sup>), family history of dementia (yes or no), history of stroke (yes or no), post-menopausal status (yes, no, male or unknown), number of medications taken (1-3, 4-6, 7-9 or 10+), number of long-term health conditions (1-2, 3, 4, 5+), number of dietary assessments completed with plausible energy intakes (2, 3, 4 or 5), healthy plant-based diet index (score, in quintiles), alcohol intake not from red wine (g/d, in quintiles), energy intake (kcal/d, in quintiles) and fat intake (g/d, in quintiles) and stratified by region (London, North-West England, North-East England, Yorkshire, West Midlands, East Midlands, South-East England, South-West England, Scotland and Wales).

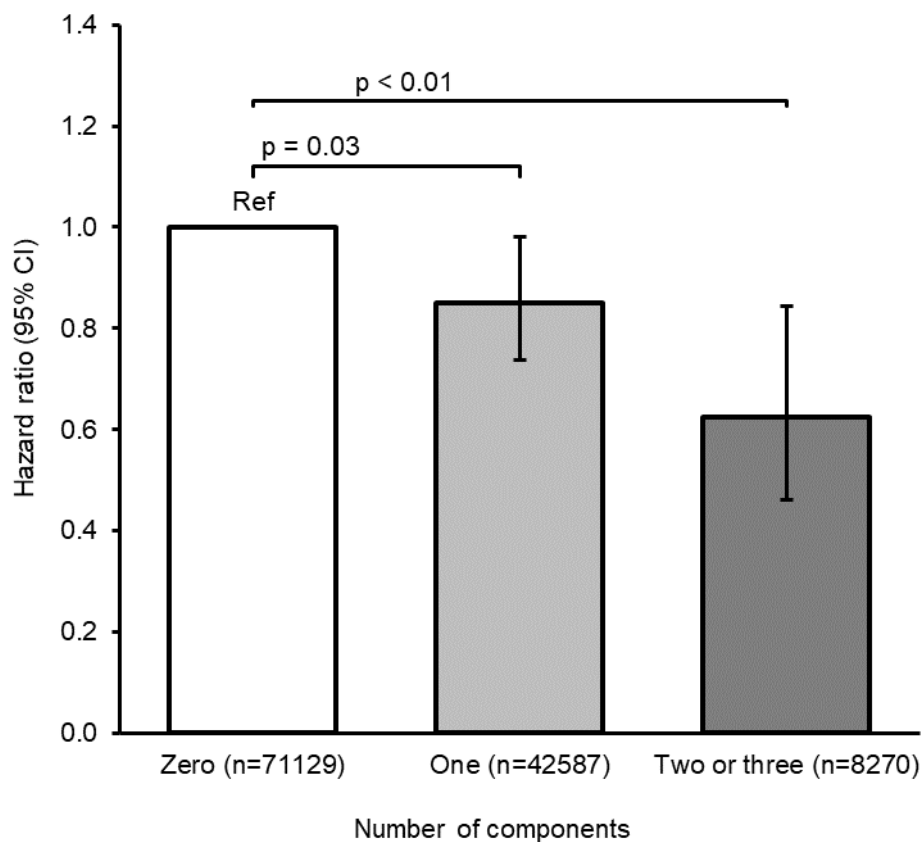

**eTable1. International Classification of Diseases Codes Used for Ascertainment of Dementia**

| Codes  |                                                                                                                                                                                                                      |
|--------|----------------------------------------------------------------------------------------------------------------------------------------------------------------------------------------------------------------------|
| ICD-9  | 290.2, 290.3, 290.4, 291.2, 294.1, 331.0, 331.1, 331.2, 331.5                                                                                                                                                        |
| ICD-10 | A81.0, F00, F00.0, F00.1, F00.2, F00.9, F01, F01.0, F01.1, F01.2, F01.3, F01.8, F01.9, F02, F02.0, F02.1, F02.2, F02.3, F02.4, F02.8, F03, F05.1, F10.6, G30, G30.0, G30.1, G30.8, G30.9, G31.0, G31.1, G31.8, I67.3 |

**eTable 2. Percent Contribution of Flavonoid-Rich Foods and the Flavodiet Score to Intake of Flavonoid Subclasses in 121 986 Males and Females From the UK Biobank**

| Food                         | Servings/d<br>Mean (SD) | Percentage contribution to flavonoid subclass intake |             |             |          |         |         |                               | Total Flavonoid |
|------------------------------|-------------------------|------------------------------------------------------|-------------|-------------|----------|---------|---------|-------------------------------|-----------------|
|                              |                         | Flavanone                                            | Anthocyanin | Flavan-3-ol | Flavonol | Flavone | Polymer | Proanthocyanidin <sup>2</sup> |                 |
| Tea                          | 2.7 (1.8)               | 0.0                                                  | 0.0         | 84.1        | 54.4     | 6.9     | 71.0    | 48.1                          | 68.7            |
| Apples                       | 0.36 (0.65)             | 0.0                                                  | 2.4         | 2.2         | 5.4      | 4.9     | 7.5     | 12.5                          | 5.8             |
| Red wine                     | 0.38 (0.48)             | 6.0                                                  | 40.4        | 3.6         | 2.8      | 9.5     | 3.3     | 6.7                           | 4.7             |
| Grapes                       | 0.17 (0.34)             | 0.0                                                  | 14.8        | 0.4         | 0.6      | 10.7    | 1.9     | 3.1                           | 1.9             |
| Berries                      | 0.03 (0.10)             | 0.0                                                  | 24.3        | 0.5         | 1.1      | 0.4     | 1.3     | 2.3                           | 1.9             |
| Dark chocolate               | 0.19 (0.36)             | 0.0                                                  | 0.0         | 0.4         | 0.1      | 0.0     | 1.7     | 2.8                           | 1.3             |
| Oranges                      | 0.15 (0.22)             | 37.6                                                 | 0.0         | 0.0         | 0.3      | 2.6     | 0.0     | 0.0                           | 1.1             |
| Onions                       | 0.34 (0.51)             | 0.0                                                  | 0.0         | 0.0         | 7.2      | 0.2     | 0.0     | 0.0                           | 0.3             |
| Grapefruit                   | 0.09 (0.17)             | 3.7                                                  | 0.0         | 0.0         | 0.0      | 1.3     | 0.0     | 0.0                           | 0.1             |
| Peppers                      | 0.02 (0.10)             | 0.0                                                  | 0.0         | 0.0         | 0.3      | 17.2    | 0.0     | 0.0                           | 0.0             |
| flavodiet score <sup>1</sup> | 4.4 (2.2)               | 47.4                                                 | 82.0        | 91.1        | 72.4     | 53.6    | 86.7    | 75.4                          | 85.8            |

<sup>1</sup> flavodiet score was calculated by summing intakes (in servings per day) of tea (black and green), red wine, apples, berries, grapes, oranges, grapefruit, sweet peppers, onions, and dark chocolate.

<sup>2</sup>Proanthocyanidins are also included in the polymer subclass.

**eTable 3. Baseline Characteristics by Inclusion Status in 502 411 Males and Females From the UK Biobank.**

| Characteristic                  | Included sample<br>(n=121986) | Excluded sample<br>(n=380425) | Data available<br>(n=) |
|---------------------------------|-------------------------------|-------------------------------|------------------------|
| Age (y)                         | 57.0 [50.0, 62.0]             | 58.0 [50.0, 63.0]             | 502408                 |
| Physical activity (excess METs) | 1176 [512, 2334]              | 1171 [456, 2586]              | 482032                 |
| BMI (kg/m <sup>2</sup> )        | 26.0 [23.6, 29.0]             | 27.0 [24.4, 30.2]             | 499304                 |
| Sex                             |                               |                               |                        |
| Female                          | 67866 (55.6%)                 | 205459 (54.0%)                |                        |
| Male                            | 54120 (44.4%)                 | 174966 (46.0%)                | 502411                 |
| Ethnicity                       |                               |                               |                        |
| Asian                           | 1115 (0.9%)                   | 8764 (2.3%)                   |                        |
| Black                           | 930 (0.8%)                    | 7128 (1.9%)                   |                        |
| Chinese                         | 310 (0.3%)                    | 1263 (0.3%)                   |                        |
| Mixed                           | 651 (0.5%)                    | 2303 (0.6%)                   |                        |
| White                           | 117918 (96.7%)                | 354694 (93.2%)                |                        |
| Other                           | 698 (0.6%)                    | 3859 (1.0%)                   |                        |
| Unknown                         | 364 (0.3%)                    | 2414 (0.6%)                   | 502411                 |
| Townsend Deprivation            |                               |                               |                        |
| Low deprivation                 | 26757 (21.9%)                 | 73633 (19.4%)                 |                        |
| Moderate deprivation            | 75746 (62.1%)                 | 225294 (59.3%)                |                        |
| High deprivation                | 19483 (16.0%)                 | 80872 (21.3%)                 | 501785                 |
| Education level                 |                               |                               |                        |
| None                            | 7731 (6.3%)                   | 77528 (20.4%)                 |                        |
| Lower secondary                 | 27924 (22.9%)                 | 104137 (27.4%)                |                        |
| Upper secondary                 | 16418 (13.5%)                 | 38890 (10.2%)                 |                        |
| Vocational                      | 5945 (4.9%)                   | 26779 (7.0%)                  |                        |
| Higher                          | 63653 (52.2%)                 | 123274 (32.4%)                |                        |
| Unknown                         | 315 (0.3%)                    | 9817 (2.6%)                   | 502411                 |
| Current smoker                  |                               |                               |                        |
| No                              | 113604 (93.1%)                | 334524 (88.2%)                |                        |
| Yes                             | 8382 (6.9%)                   | 44580 (11.8%)                 | 501090                 |
| Sleep duration                  |                               |                               |                        |
| ≤6 hours                        | 26218 (21.5%)                 | 97010 (25.5%)                 |                        |
| 7-8 hours                       | 87991 (72.1%)                 | 248635 (65.4%)                |                        |
| > 8 hours                       | 7575 (6.2%)                   | 31655 (8.3%)                  |                        |
| Unknown                         | 202 (0.2%)                    | 3125 (0.8%)                   | 502411                 |
| Family history of dementia      |                               |                               |                        |
| No                              | 105681 (86.6%)                | 338310 (88.9%)                |                        |
| Yes                             | 16305 (13.4%)                 | 42115 (11.1%)                 | 502411                 |
| Stroke history                  |                               |                               |                        |
| No                              | 119053 (97.6%)                | 365468 (96.1%)                |                        |
| Yes                             | 2933 (2.4%)                   | 14957 (3.9%)                  | 502411                 |
| Post menopausal                 |                               |                               |                        |
| No                              | 17612 (14.4%)                 | 46431 (12.2%)                 |                        |
| Yes                             | 40032 (32.8%)                 | 125348 (33.0%)                |                        |
| Male                            | 54120 (44.4%)                 | 174966 (46.0%)                |                        |
| Unknown                         | 10222 (8.4%)                  | 33204 (8.7%)                  | 501935                 |
| Number of medications taken     |                               |                               |                        |
| None                            | 37977 (31.1%)                 | 99654 (26.2%)                 |                        |
| 1-3                             | 56923 (46.7%)                 | 173242 (45.5%)                |                        |
| 4-6                             | 19997 (16.4%)                 | 72616 (19.1%)                 |                        |
| 7-9                             | 5232 (4.3%)                   | 23966 (6.3%)                  |                        |
| >10                             | 1857 (1.5%)                   | 10947 (2.9%)                  | 502411                 |
| Number long term conditions     |                               |                               |                        |
| 0                               | 43178 (35.4%)                 | 125315 (32.9%)                |                        |

|                                  |                |                |        |
|----------------------------------|----------------|----------------|--------|
| 1                                | 39841 (32.7%)  | 122513 (32.2%) |        |
| 2                                | 22568 (18.5%)  | 74356 (19.5%)  |        |
| >3                               | 16399 (13.4%)  | 58241 (15.3%)  | 502411 |
| APOE ε4 carrier                  |                |                |        |
| No                               | 86086 (72.1%)  | 262016 (71.4%) |        |
| Yes                              | 33317 (27.9%)  | 104946 (28.6%) | 486365 |
| Genetic risk category            |                |                |        |
| Low risk                         | 24100 (20.2%)  | 73124 (19.9%)  |        |
| Medium risk                      | 71830 (60.2%)  | 219841 (59.9%) |        |
| High risk                        | 23424 (19.6%)  | 73799 (20.1%)  | 486118 |
| Genetic kinship                  |                |                |        |
| At least one relative identified | 33365 (27.4%)  | 114312 (30.0%) |        |
| No kinship found                 | 86191 (70.7%)  | 253325 (66.6%) |        |
| Unknown                          | 2430 (2.0%)    | 12788 (3.4%)   | 502411 |
| Depressive symptoms              |                |                |        |
| No                               | 65 (0.1%)      | 820 (0.2%)     |        |
| Yes                              | 121921 (99.9%) | 378730 (99.8%) | 501536 |
| Hypertension                     |                |                |        |
| No                               | 68287 (56.0%)  | 197426 (51.9%) |        |
| Yes                              | 53694 (44.0%)  | 182878 (48.1%) | 502285 |

Values are median [IQR] or n= (%).

**eTable 4. Baseline Characteristics and Dietary Intakes by Dementia Diagnosis in 121 986 Males and Females From the UK Biobank**

| Characteristic                         | All (n=121986)    | No dementia (n=121104) | Incident dementia (n=882) |
|----------------------------------------|-------------------|------------------------|---------------------------|
| Age (y)                                | 57.0 [50.0, 62.0] | 57.0 [50.0, 62.0]      | 65.0 [62.0, 67.0]         |
| Duration of follow up (y)              | 9.4 [9.3, 9.8]    | 9.4 [9.3, 9.8]         | 7.1 [5.5, 8.4]            |
| Physical activity (excess METs)        | 1176 [512, 2334]  | 1176 [512, 2334]       | 1065 [525, 2349]          |
| BMI (kg/m <sup>2</sup> )               | 26.0 [23.6, 29.0] | 26.0 [23.6, 29.0]      | 26.2 [23.7, 29.5]         |
| Flavanones (mg/d)                      | 17.9 [5.2, 35.7]  | 17.9 [5.2, 35.7]       | 19.1 [5.2, 37.8]          |
| Anthocyanins (mg/d)                    | 20.5 [7.1, 40.3]  | 20.5 [7.1, 40.3]       | 20.7 [7.2, 41.1]          |
| Flavan-3-ols (mg/d)                    | 166 [85.1, 247]   | 166 [85.2, 247]        | 161 [78.1, 235]           |
| Flavonols (mg/d)                       | 31.8 [20.3, 43.5] | 31.8 [20.3, 43.5]      | 31.9 [19.1, 43.5]         |
| Flavones (mg/d)                        | 0.86 [0.46, 1.4]  | 0.86 [0.46, 1.4]       | 0.85 [0.45, 1.4]          |
| Polymers (mg/d)                        | 520 [268, 767]    | 520 [268, 767]         | 533 [273, 761]            |
| Proanthocyanidins (mg/d)               | 336 [230, 446]    | 336 [230, 446]         | 344 [232, 448]            |
| Total Flavonoids (mg/d)                | 793 [452, 1119]   | 793 [452, 1119]        | 808 [444, 1126]           |
| flavodiet score                        | 4.3 [2.8, 5.9]    | 4.3 [2.8, 5.9]         | 4.3 [2.8, 5.8]            |
| flavodiet score (tea capped at 4 cups) | 4.2 [2.8, 5.3]    | 4.2 [2.8, 5.3]         | 4.3 [2.8, 5.4]            |
| Tea (servings/d)                       | 2.7 [1.0, 4.0]    | 2.7 [1.2, 4.0]         | 2.5 [1.0, 3.8]            |
| Red wine (servings/d)                  | 0.00 [0.00, 0.50] | 0.00 [0.00, 0.50]      | 0.00 [0.00, 0.50]         |
| Apples (servings/d)                    | 0.25 [0.00, 0.67] | 0.25 [0.00, 0.67]      | 0.33 [0.00, 0.75]         |
| Grapes (servings/d)                    | 0.00 [0.00, 0.25] | 0.00 [0.00, 0.25]      | 0.00 [0.00, 0.25]         |
| Dark chocolate (servings/d)            | 0.00 [0.00, 0.00] | 0.00 [0.00, 0.00]      | 0.00 [0.00, 0.00]         |
| Berries (servings/d)                   | 0.00 [0.00, 0.25] | 0.00 [0.00, 0.25]      | 0.00 [0.00, 0.25]         |
| Onions (servings/d)                    | 0.05 [0.00, 0.25] | 0.05 [0.00, 0.25]      | 0.00 [0.00, 0.17]         |
| Oranges (servings/d)                   | 0.00 [0.00, 0.50] | 0.00 [0.00, 0.50]      | 0.00 [0.00, 0.67]         |
| Peppers (servings/d)                   | 0.00 [0.00, 0.13] | 0.00 [0.00, 0.13]      | 0.00 [0.00, 0.08]         |
| Grapefruit (servings/d)                | 0.00 [0.00, 0.00] | 0.00 [0.00, 0.00]      | 0.00 [0.00, 0.00]         |
| Energy (kcal/d)                        | 2009 [1718, 2332] | 2009 [1718, 2332]      | 2013 [1719, 2360]         |
| Fat (g/d)                              | 70.4 [56.1, 86.5] | 70.4 [56.1, 86.5]      | 71.2 [55.3, 87.1]         |
| Alcohol not from red wine (g)          | 4.6 [0.00, 16.5]  | 4.7 [0.00, 16.5]       | 4.3 [0.00, 14.6]          |
| hPDI (score)                           | 54.0 [49.0, 58.0] | 54.0 [49.0, 58.0]      | 54.0 [50.0, 59.0]         |
| Days of dietary assessment completed   | 3.0 [2.0, 4.0]    | 3.0 [2.0, 4.0]         | 3.0 [2.0, 3.0]            |
| Sex                                    |                   |                        |                           |
| Female                                 | 67866 (55.6%)     | 67447 (55.7%)          | 419 (47.5%)               |
| Male                                   | 54120 (44.4%)     | 53657 (44.3%)          | 463 (52.5%)               |
| Ethnicity                              |                   |                        |                           |
| Asian                                  | 1115 (0.9%)       | 1112 (0.9%)            | 3 (0.3%)                  |
| Black                                  | 930 (0.8%)        | 927 (0.8%)             | 3 (0.3%)                  |
| Chinese                                | 310 (0.3%)        | 309 (0.3%)             | 1 (0.1%)                  |
| Mixed                                  | 651 (0.5%)        | 649 (0.5%)             | 2 (0.2%)                  |
| White                                  | 117918 (96.7%)    | 117051 (96.7%)         | 867 (98.3%)               |
| Other                                  | 698 (0.6%)        | 695 (0.6%)             | 3 (0.3%)                  |
| Unknown                                | 364 (0.3%)        | 361 (0.3%)             | 3 (0.3%)                  |
| Townsend Deprivation                   |                   |                        |                           |
| Low deprivation                        | 24435 (20.0%)     | 24246 (20.0%)          | 189 (21.4%)               |
| Moderate deprivation                   | 73154 (60.0%)     | 72644 (60.0%)          | 510 (57.8%)               |
| High deprivation                       | 24397 (20.0%)     | 24214 (20.0%)          | 183 (20.7%)               |
| Education level                        |                   |                        |                           |
| None                                   | 7731 (6.3%)       | 7612 (6.3%)            | 119 (13.5%)               |
| Lower secondary                        | 27924 (22.9%)     | 27726 (22.9%)          | 198 (22.4%)               |
| Upper secondary                        | 16418 (13.5%)     | 16314 (13.5%)          | 104 (11.8%)               |
| Vocational                             | 5945 (4.9%)       | 5894 (4.9%)            | 51 (5.8%)                 |
| Higher                                 | 63653 (52.2%)     | 63245 (52.2%)          | 408 (46.3%)               |
| Unknown                                | 315 (0.3%)        | 313 (0.3%)             | 2 (0.2%)                  |
| Current smoker                         |                   |                        |                           |

|                                  |                |                |              |
|----------------------------------|----------------|----------------|--------------|
| No                               | 113604 (93.1%) | 112786 (93.1%) | 818 (92.7%)  |
| Yes                              | 8382 (6.9%)    | 8318 (6.9%)    | 64 (7.3%)    |
| Sleep duration                   |                |                |              |
| <=6 hours                        | 26218 (21.5%)  | 26016 (21.5%)  | 202 (22.9%)  |
| 7-8 hours                        | 87991 (72.1%)  | 87398 (72.2%)  | 593 (67.2%)  |
| > 8 hours                        | 7575 (6.2%)    | 7489 (6.2%)    | 86 (9.8%)    |
| Unknown                          | 202 (0.2%)     | 201 (0.2%)     | 1 (0.1%)     |
| Family history of dementia       |                |                |              |
| No                               | 105681 (86.6%) | 105042 (86.7%) | 639 (72.4%)  |
| Yes                              | 16305 (13.4%)  | 16062 (13.3%)  | 243 (27.6%)  |
| Stroke history                   |                |                |              |
| No                               | 119053 (97.6%) | 118265 (97.7%) | 788 (89.3%)  |
| Yes                              | 2933 (2.4%)    | 2839 (2.3%)    | 94 (10.7%)   |
| Post menopausal                  |                |                |              |
| No                               | 17612 (14.4%)  | 17595 (14.5%)  | 17 (1.9%)    |
| Yes                              | 40032 (32.8%)  | 39696 (32.8%)  | 336 (38.1%)  |
| Male                             | 54120 (44.4%)  | 53657 (44.3%)  | 463 (52.5%)  |
| Unknown                          | 10222 (8.4%)   | 10156 (8.4%)   | 66 (7.5%)    |
| Number of medications taken      |                |                |              |
| None                             | 37977 (31.1%)  | 37830 (31.2%)  | 147 (16.7%)  |
| 1-3                              | 56923 (46.7%)  | 56578 (46.7%)  | 345 (39.1%)  |
| 4-6                              | 19997 (16.4%)  | 19755 (16.3%)  | 242 (27.4%)  |
| 7-9                              | 5232 (4.3%)    | 5145 (4.2%)    | 87 (9.9%)    |
| >10                              | 1857 (1.5%)    | 1796 (1.5%)    | 61 (6.9%)    |
| Number long term conditions      |                |                |              |
| 0                                | 43178 (35.4%)  | 42996 (35.5%)  | 182 (20.6%)  |
| 1                                | 39841 (32.7%)  | 39583 (32.7%)  | 258 (29.3%)  |
| 2                                | 22568 (18.5%)  | 22350 (18.5%)  | 218 (24.7%)  |
| >3                               | 16399 (13.4%)  | 16175 (13.4%)  | 224 (25.4%)  |
| APOE ε4 carrier                  |                |                |              |
| No                               | 86086 (72.1%)  | 85662 (72.3%)  | 424 (49.0%)  |
| Yes                              | 33317 (27.9%)  | 32876 (27.7%)  | 441 (51.0%)  |
| Genetic risk category            |                |                |              |
| Low risk                         | 23872 (20.0%)  | 23783 (20.1%)  | 89 (10.3%)   |
| Medium risk                      | 71612 (60.0%)  | 71190 (60.1%)  | 422 (48.8%)  |
| High risk                        | 23870 (20.0%)  | 23517 (19.8%)  | 353 (40.9%)  |
| Genetic kinship                  |                |                |              |
| At least one relative identified | 33365 (27.4%)  | 33104 (27.3%)  | 261 (29.6%)  |
| No kinship found                 | 86191 (70.7%)  | 85586 (70.7%)  | 605 (68.6%)  |
| Unknown                          | 2430 (2.0%)    | 2414 (2.0%)    | 16 (1.8%)    |
| Depressive symptoms              |                |                |              |
| No                               | 65 (0.1%)      | 65 (0.1%)      | 0 (0.0%)     |
| Yes                              | 121921 (99.9%) | 121039 (99.9%) | 882 (100.0%) |
| Hypertension                     |                |                |              |
| No                               | 68287 (56.0%)  | 67938 (56.1%)  | 349 (39.6%)  |
| Yes                              | 53694 (44.0%)  | 53161 (43.9%)  | 533 (60.4%)  |

Values are median [IQR] or n= (%). <sup>1</sup>Proanthocyanidins are also included in the polymer subclass. <sup>2</sup>flavodiet score was calculated by summing intakes (in servings per day) of tea (black and green), red wine, apples, berries, grapes, oranges, grapefruit, sweet peppers, onions, and dark chocolate.

**eTable 5. Estimated Hazard Ratios for LASSO Cox Regression Between Risk of Dementia and Flavodiet Score in 121 986 Males and Females From the UK Biobank**

| <b>Variable</b>                          | <b>Coefficients<sup>1</sup></b> |
|------------------------------------------|---------------------------------|
| flavodiet score (quintiles) <sup>2</sup> | 0.95                            |
| Sex                                      | 1.12                            |
| Townsend Index                           | 1.08                            |
| Highest level of education               | 0.98                            |
| Ethnicity                                | 0                               |
| Current smoking status                   | 1.46                            |
| Typical sleep duration                   | 0                               |
| Physical activity                        | 0.98                            |
| BMI                                      | 0                               |
| Family history of dementia               | 2.06                            |
| History of stroke                        | 2.53                            |
| Post-menopausal status                   | 0                               |
| Number of medications taken              | 1.35                            |
| Number of dietary assessments completed  | 0.87                            |
| Healthy plant-based diet index           | 0                               |
| Alcohol intake not from red wine         | 0.96                            |
| Energy intake                            | 1.03                            |
| Fat intake                               | 0                               |

<sup>1</sup>Values are the post selection coefficients of the unstandardized variables calculated from LASSO Cox regression. <sup>2</sup>flavodiet score was calculated by summing intakes (in servings per day) of tea (black and green), red wine, apples, berries, grapes, oranges, grapefruit, sweet peppers, onions, and dark chocolate, values relate to per quintile of the score.



**eTable 6. Risk of Dementia by Quintiles of Flavodiet Score After Removing Each Food From the Final Score in 121 986 Males and Females From the UK Biobank**

| Intake component                              | Q1          | Q2                | Q3                | Q4                | Q5                | P-trend |
|-----------------------------------------------|-------------|-------------------|-------------------|-------------------|-------------------|---------|
| <b>flavodiet score (tea capped at 4 cups)</b> |             |                   |                   |                   |                   |         |
| n= (cases)                                    | 23379 (174) | 24166 (163)       | 24589 (170)       | 24484 (188)       | 25368 (187)       |         |
| HR (95% CI)                                   | 1.00        | 0.79 (0.64, 0.99) | 0.79 (0.64, 0.98) | 0.81 (0.66, 1.01) | 0.74 (0.60, 0.93) | 0.03    |
| <b>flavodiet score (w/o tea)</b>              |             |                   |                   |                   |                   |         |
| n= (cases)                                    | 20777 (124) | 26392 (189)       | 25803 (182)       | 24339 (188)       | 24675 (199)       |         |
| HR (95% CI)                                   | 1.00        | 1.04 (0.83, 1.31) | 0.99 (0.79, 1.25) | 1.05 (0.83, 1.33) | 1.03 (0.81, 1.32) | 0.83    |
| <b>flavodiet score (w/o red wine)</b>         |             |                   |                   |                   |                   |         |
| n= (cases)                                    | 23902 (176) | 24875 (170)       | 23301 (164)       | 24285 (188)       | 25623 (184)       |         |
| HR (95% CI)                                   | 1.00        | 0.83 (0.67, 1.02) | 0.82 (0.66, 1.02) | 0.86 (0.70, 1.07) | 0.81 (0.65, 1.01) | 0.16    |
| <b>flavodiet score (w/o apples)</b>           |             |                   |                   |                   |                   |         |
| n= (cases)                                    | 24023 (183) | 23137 (171)       | 25922 (181)       | 24215 (174)       | 24689 (173)       |         |
| HR (95% CI)                                   | 1.00        | 0.84 (0.68, 1.03) | 0.75 (0.61, 0.93) | 0.74 (0.59, 0.91) | 0.71 (0.57, 0.89) | <0.01   |
| <b>flavodiet score (w/o grapes)</b>           |             |                   |                   |                   |                   |         |
| n= (cases)                                    | 24225 (183) | 24256 (163)       | 24592 (189)       | 24127 (174)       | 24786 (173)       |         |
| HR (95% CI)                                   | 1.00        | 0.79 (0.64, 0.97) | 0.87 (0.70, 1.07) | 0.78 (0.63, 0.97) | 0.74 (0.59, 0.93) | 0.02    |
| <b>flavodiet score (w/o dark chocolate)</b>   |             |                   |                   |                   |                   |         |
| n= (cases)                                    | 23441 (176) | 23896 (160)       | 24518 (175)       | 24553 (193)       | 25578 (178)       |         |
| HR (95% CI)                                   | 1.00        | 0.78 (0.63, 0.97) | 0.77 (0.62, 0.96) | 0.85 (0.69, 1.06) | 0.71 (0.57, 0.89) | 0.03    |
| <b>flavodiet score (w/o berries)</b>          |             |                   |                   |                   |                   |         |
| n= (cases)                                    | 22366 (165) | 26237 (179)       | 23157 (162)       | 25569 (194)       | 24657 (182)       |         |
| HR (95% CI)                                   | 1.00        | 0.80 (0.65, 0.99) | 0.80 (0.65, 1.00) | 0.82 (0.66, 1.02) | 0.77 (0.61, 0.96) | 0.07    |
| <b>flavodiet score (w/o onions)</b>           |             |                   |                   |                   |                   |         |
| n= (cases)                                    | 24380 (177) | 23542 (163)       | 25130 (175)       | 24063 (200)       | 24871 (167)       |         |
| HR (95% CI)                                   | 1.00        | 0.82 (0.66, 1.02) | 0.79 (0.64, 0.97) | 0.91 (0.74, 1.13) | 0.71 (0.57, 0.89) | 0.03    |
| <b>flavodiet score (w/o oranges)</b>          |             |                   |                   |                   |                   |         |
| n= (cases)                                    | 23471 (184) | 24514 (157)       | 25080 (204)       | 24053 (171)       | 24868 (166)       |         |
| HR (95% CI)                                   | 1.00        | 0.71 (0.57, 0.88) | 0.85 (0.69, 1.04) | 0.72 (0.58, 0.89) | 0.67 (0.54, 0.84) | <0.01   |
| <b>flavodiet score (w/o peppers)</b>          |             |                   |                   |                   |                   |         |
| n= (cases)                                    | 23797 (178) | 24081 (157)       | 24579 (179)       | 24051 (193)       | 25478 (175)       |         |
| HR (95% CI)                                   | 1.00        | 0.76 (0.61, 0.95) | 0.79 (0.64, 0.98) | 0.85 (0.69, 1.05) | 0.70 (0.56, 0.88) | 0.02    |
| <b>flavodiet score (w/o grapefruit)</b>       |             |                   |                   |                   |                   |         |
| n= (cases)                                    | 23574 (173) | 23682 (165)       | 24524 (172)       | 24605 (195)       | 25601 (177)       |         |
| HR (95% CI)                                   | 1.00        | 0.83 (0.67, 1.03) | 0.78 (0.63, 0.97) | 0.88 (0.71, 1.08) | 0.73 (0.58, 0.91) | 0.03    |

Values are adjusted hazard ratios (95% CI), n=121,986 (882 cases). flavodiet score was calculated by summing intakes (in servings per day) of tea (black and green), red wine, apples, berries, grapes, oranges, grapefruit, sweet peppers, onions, and dark chocolate. Models adjusted for sex (male or female), socioeconomic status (Townsend Index, categorised as low [quintile 1], moderate [quintiles 2–4], high [quintile 5] deprivation), highest level of education (higher, vocational, upper Secondary, lower Secondary, none or unknown), ethnicity (White, Mixed, Asian, Black, Chinese, other group, not answered), current smoking status (yes or no), typical sleep duration ( $\leq 6$  hours, 7–8 hours or  $> 8$  hours, not answered), physical activity (total excess metabolic equivalents, in quintiles), BMI (kg/m<sup>2</sup>), family history of dementia (yes or no), history of stroke (yes or no), post-menopausal status (yes, no, male or unknown), number of medications taken (1-3, 4-6, 7-9 or 10+), number of long-term health conditions (1-2, 3, 4, 5+), number of dietary assessments completed with plausible energy intakes (2, 3, 4 or 5), healthy plant-based diet index (score, in quintiles), alcohol intake not from red wine (g/d, in quintiles), energy intake (kcal/d, in quintiles) and fat intake (g/d, in quintiles) and stratified by region (London, North-West England, North-East England, Yorkshire, West Midlands, East Midlands, South-East England, South-West England, Scotland and Wales).

**eTable 7. Risk of Dementia by Quintiles of Flavodiet Score and Flavonoid Subclass Intake in 121 986 Males and Females From the UK Biobank, Stratified by Genetic Risk**

| <b>Intake component</b>                     | <b>Q1</b>  | <b>Q2</b>         | <b>Q3</b>         | <b>Q4</b>         | <b>Q5</b>         | <b>P-trend</b> | <b>P-interaction</b> |
|---------------------------------------------|------------|-------------------|-------------------|-------------------|-------------------|----------------|----------------------|
| <b>High genetic risk</b>                    |            |                   |                   |                   |                   |                |                      |
| <b>flavodiet score (points)<sup>1</sup></b> |            |                   |                   |                   |                   |                |                      |
| n= (cases)                                  | 7438 (112) | 7559 (85)         | 6942 (84)         | 7131 (102)        | 7235 (79)         |                |                      |
| HR (95% CI)                                 | 1.00       | 0.62 (0.46, 0.82) | 0.64 (0.48, 0.86) | 0.74 (0.56, 0.98) | 0.57 (0.42, 0.78) | 0.01           | 0.02                 |
| <b>Flavanones (mg/d)</b>                    |            |                   |                   |                   |                   |                |                      |
| n= (cases)                                  | 7262 (91)  | 7261 (83)         | 7261 (91)         | 7261 (89)         | 7260 (108)        |                |                      |
| HR (95% CI)                                 | 1.00       | 0.89 (0.66, 1.20) | 0.93 (0.69, 1.25) | 0.88 (0.66, 1.19) | 1.01 (0.76, 1.35) | 0.92           | 0.77                 |
| <b>Anthocyanins (mg/d)</b>                  |            |                   |                   |                   |                   |                |                      |
| n= (cases)                                  | 7262 (95)  | 7261 (85)         | 7261 (102)        | 7261 (97)         | 7260 (83)         |                |                      |
| HR (95% CI)                                 | 1.00       | 0.72 (0.53, 0.97) | 0.82 (0.62, 1.10) | 0.72 (0.54, 0.97) | 0.60 (0.44, 0.82) | <0.01          | 0.01                 |
| <b>Flavan-3-ols (mg/d)</b>                  |            |                   |                   |                   |                   |                |                      |
| n= (cases)                                  | 7262 (112) | 7261 (92)         | 7261 (96)         | 7261 (84)         | 7260 (78)         |                |                      |
| HR (95% CI)                                 | 1.00       | 0.70 (0.53, 0.93) | 0.72 (0.54, 0.95) | 0.61 (0.46, 0.82) | 0.58 (0.43, 0.79) | <0.01          | 0.05                 |
| <b>Flavonols (mg/d)</b>                     |            |                   |                   |                   |                   |                |                      |
| n= (cases)                                  | 7262 (117) | 7261 (94)         | 7262 (75)         | 7260 (88)         | 7260 (88)         |                |                      |
| HR (95% CI)                                 | 1.00       | 0.67 (0.51, 0.89) | 0.53 (0.39, 0.71) | 0.59 (0.44, 0.78) | 0.58 (0.43, 0.78) | <0.01          | 0.03                 |
| <b>Flavones (mg/d)</b>                      |            |                   |                   |                   |                   |                |                      |
| n= (cases)                                  | 7262 (94)  | 7261 (87)         | 7261 (97)         | 7261 (97)         | 7260 (87)         |                |                      |
| HR (95% CI)                                 | 1.00       | 0.81 (0.60, 1.08) | 0.85 (0.63, 1.14) | 0.87 (0.65, 1.17) | 0.78 (0.56, 1.07) | 0.26           | 1.00                 |
| <b>Polymers (mg/d)</b>                      |            |                   |                   |                   |                   |                |                      |
| n= (cases)                                  | 7262 (96)  | 7261 (97)         | 7261 (98)         | 7261 (92)         | 7260 (79)         |                |                      |
| HR (95% CI)                                 | 1.00       | 0.81 (0.61, 1.07) | 0.84 (0.63, 1.12) | 0.72 (0.54, 0.97) | 0.64 (0.47, 0.88) | 0.01           | 0.07                 |
| <b>Proanthocyanidins (mg/d)<sup>2</sup></b> |            |                   |                   |                   |                   |                |                      |
| n= (cases)                                  | 7262 (103) | 7261 (96)         | 7261 (92)         | 7261 (82)         | 7260 (89)         |                |                      |
| HR (95% CI)                                 | 1.00       | 0.80 (0.61, 1.07) | 0.72 (0.54, 0.97) | 0.61 (0.45, 0.82) | 0.63 (0.46, 0.86) | <0.01          | 0.07                 |
| <b>Total flavonoids (mg/d)</b>              |            |                   |                   |                   |                   |                |                      |
| n= (cases)                                  | 7262 (112) | 7261 (83)         | 7261 (97)         | 7261 (89)         | 7260 (81)         |                |                      |
| HR (95% CI)                                 | 1.00       | 0.62 (0.47, 0.83) | 0.71 (0.54, 0.94) | 0.61 (0.46, 0.81) | 0.58 (0.43, 0.78) | <0.01          | 0.02                 |
| <b>Low genetic risk</b>                     |            |                   |                   |                   |                   |                |                      |
| <b>flavodiet score (points)<sup>1</sup></b> |            |                   |                   |                   |                   |                |                      |
| n= (cases)                                  | 17741 (74) | 16634 (78)        | 17824 (95)        | 16543 (85)        | 16939 (88)        |                |                      |
| HR (95% CI)                                 | 1.00       | 1.02 (0.74, 1.40) | 1.11 (0.81, 1.51) | 1.04 (0.75, 1.44) | 0.99 (0.71, 1.38) | 0.99           | -                    |
| <b>Flavanones (mg/d)</b>                    |            |                   |                   |                   |                   |                |                      |
| n= (cases)                                  | 17137 (85) | 17137 (89)        | 17135 (74)        | 17137 (83)        | 17135 (89)        |                |                      |
| HR (95% CI)                                 | 1.00       | 1.01 (0.75, 1.36) | 0.83 (0.60, 1.13) | 0.88 (0.65, 1.20) | 0.92 (0.68, 1.25) | 0.40           | -                    |
| <b>Anthocyanins (mg/d)</b>                  |            |                   |                   |                   |                   |                |                      |
| n= (cases)                                  | 17137 (66) | 17137 (88)        | 17135 (79)        | 17137 (86)        | 17135 (101)       |                |                      |
| HR (95% CI)                                 | 1.00       | 1.16 (0.84, 1.61) | 0.96 (0.69, 1.34) | 0.99 (0.71, 1.38) | 1.06 (0.77, 1.48) | 0.90           | -                    |

|                                              |            |                   |                   |                   |                   |      |   |
|----------------------------------------------|------------|-------------------|-------------------|-------------------|-------------------|------|---|
| <b>Flavan-3-ols (mg/d)</b>                   |            |                   |                   |                   |                   |      |   |
| n= (cases)                                   | 17137 (80) | 17137 (80)        | 17135 (93)        | 17137 (79)        | 17135 (88)        |      |   |
| HR (95% CI)                                  | 1.00       | 0.94 (0.69, 1.28) | 1.00 (0.74, 1.35) | 0.86 (0.62, 1.18) | 0.92 (0.67, 1.25) | 0.47 | - |
| <b>Flavonols (mg/d)</b>                      |            |                   |                   |                   |                   |      |   |
| n= (cases)                                   | 17137 (79) | 17137 (77)        | 17135 (76)        | 17137 (98)        | 17135 (90)        |      |   |
| HR (95% CI)                                  | 1.00       | 0.89 (0.65, 1.23) | 0.81 (0.59, 1.11) | 1.03 (0.76, 1.40) | 0.91 (0.66, 1.25) | 0.95 | - |
| <b>Flavones (mg/d)</b>                       |            |                   |                   |                   |                   |      |   |
| n= (cases)                                   | 17137 (87) | 17137 (77)        | 17135 (92)        | 17137 (90)        | 17135 (74)        |      |   |
| HR (95% CI)                                  | 1.00       | 0.76 (0.56, 1.04) | 0.91 (0.67, 1.23) | 0.84 (0.61, 1.14) | 0.67 (0.48, 0.94) | 0.08 | - |
| <b>Polymers (mg/d)</b>                       |            |                   |                   |                   |                   |      |   |
| n= (cases)                                   | 17137 (71) | 17137 (74)        | 17135 (98)        | 17137 (89)        | 17135 (88)        |      |   |
| HR (95% CI)                                  | 1.00       | 0.95 (0.68, 1.32) | 1.18 (0.86, 1.61) | 1.04 (0.76, 1.43) | 0.99 (0.72, 1.38) | 0.86 | - |
| <b>Proanthocyanidins (mg/d) <sup>2</sup></b> |            |                   |                   |                   |                   |      |   |
| n= (cases)                                   | 17137 (74) | 17137 (72)        | 17135 (81)        | 17137 (99)        | 17135 (94)        |      |   |
| HR (95% CI)                                  | 1.00       | 0.87 (0.63, 1.21) | 0.92 (0.66, 1.27) | 1.06 (0.78, 1.46) | 0.97 (0.69, 1.36) | 0.67 | - |
| <b>Total flavonoids (mg/d)</b>               |            |                   |                   |                   |                   |      |   |
| n= (cases)                                   | 17137 (74) | 17137 (77)        | 17135 (90)        | 17137 (90)        | 17135 (89)        |      |   |
| HR (95% CI)                                  | 1.00       | 0.95 (0.69, 1.32) | 1.02 (0.74, 1.39) | 0.99 (0.72, 1.35) | 0.95 (0.69, 1.31) | 0.86 | - |

Values are adjusted hazard ratios (95% CI). Participants at high genetic risk were those in the highest quintile of PRS (n=2988), a carrier of the APOE ε4 genotype (n=12435) or both (n=20882) <sup>1</sup> flavodiet score was calculated by summing intakes (in servings per day) of tea (black and green), red wine, apples, berries, grapes, oranges, grapefruit, sweet peppers, onions, and dark chocolate. <sup>2</sup>Proanthocyanidins are also included in the polymer subclass. Models adjusted for sex (male or female), socioeconomic status (Townsend Index, categorised as low [quintile 1], moderate [quintiles 2–4], high [quintile 5] deprivation), highest level of education (higher, vocational, upper Secondary, lower Secondary, none or unknown), ethnicity (White, Mixed, Asian, Black, Chinese, other group, not answered), current smoking status (yes or no), typical sleep duration (≤ 6 hours, 7–8 hours or > 8 hours, not answered), physical activity (total excess metabolic equivalents, in quintiles), BMI (kg/m<sup>2</sup>), family history of dementia (yes or no), history of stroke (yes or no), post-menopausal status (yes, no, male or unknown), number of medications taken (1-3, 4-6, 7-9 or 10+), number of long-term health conditions (1-2, 3, 4, 5+), genetic kinship (at least one relative, no kinship, unknown), number of dietary assessments completed with plausible energy intakes (2, 3, 4 or 5), healthy plant-based diet index (score, in quintiles), alcohol intake not from red wine (g/d, in quintiles), energy intake (kcal/d, in quintiles) and fat intake (g/d, in quintiles) and stratified by region (London, North-West England, North-East England, Yorkshire, West Midlands, East Midlands, South-East England, South-West England, Scotland and Wales). P-interaction was calculated using all participants and refers to the interaction term between intake and indicator of genetic risk (high vs low) in the highest quintile of intake.

**eTable 8. Risk of Dementia by Quintiles of Flavodiet Score and Flavonoid Subclass Intake in 121 105 Males and Females From the UK Biobank, Stratified by Depression Status**

| Intake component                            | Q1          | Q2                | Q3                | Q4                | Q5                | P-trend | P-interaction |
|---------------------------------------------|-------------|-------------------|-------------------|-------------------|-------------------|---------|---------------|
| <b>With depression</b>                      |             |                   |                   |                   |                   |         |               |
| <b>flavodiet score (points)<sup>1</sup></b> |             |                   |                   |                   |                   |         |               |
| n= (cases)                                  | 7553 (63)   | 6814 (46)         | 7074 (47)         | 6923 (55)         | 6874 (35)         |         |               |
| HR (95% CI)                                 | 1.00        | 0.73 (0.50, 1.07) | 0.66 (0.45, 0.98) | 0.78 (0.54, 1.15) | 0.52 (0.33, 0.81) | 0.01    | 0.01          |
| <b>Flavanones (mg/d)</b>                    |             |                   |                   |                   |                   |         |               |
| n= (cases)                                  | 7049 (51)   | 7047 (54)         | 7048 (49)         | 7047 (38)         | 7047 (54)         |         |               |
| HR (95% CI)                                 | 1.00        | 1.02 (0.69, 1.50) | 0.94 (0.63, 1.41) | 0.69 (0.45, 1.06) | 0.95 (0.64, 1.41) | 0.32    | 0.55          |
| <b>Anthocyanins (mg/d)</b>                  |             |                   |                   |                   |                   |         |               |
| n= (cases)                                  | 7049 (46)   | 7047 (38)         | 7048 (50)         | 7047 (58)         | 7047 (54)         |         |               |
| HR (95% CI)                                 | 1.00        | 0.68 (0.44, 1.06) | 0.84 (0.55, 1.27) | 0.91 (0.60, 1.36) | 0.81 (0.54, 1.24) | 0.86    | 0.76          |
| <b>Flavan-3-ols (mg/d)</b>                  |             |                   |                   |                   |                   |         |               |
| n= (cases)                                  | 7049 (63)   | 7047 (52)         | 7048 (47)         | 7047 (49)         | 7047 (35)         |         |               |
| HR (95% CI)                                 | 1.00        | 0.78 (0.54, 1.14) | 0.62 (0.42, 0.91) | 0.65 (0.44, 0.95) | 0.49 (0.32, 0.76) | <0.01   | <0.01         |
| <b>Flavonols (mg/d)</b>                     |             |                   |                   |                   |                   |         |               |
| n= (cases)                                  | 7049 (59)   | 7047 (46)         | 7048 (47)         | 7047 (47)         | 7047 (47)         |         |               |
| HR (95% CI)                                 | 1.00        | 0.68 (0.46, 1.00) | 0.64 (0.43, 0.95) | 0.65 (0.44, 0.96) | 0.64 (0.42, 0.97) | 0.05    | 0.13          |
| <b>Flavones (mg/d)</b>                      |             |                   |                   |                   |                   |         |               |
| n= (cases)                                  | 7049 (50)   | 7047 (45)         | 7048 (60)         | 7047 (41)         | 7047 (50)         |         |               |
| HR (95% CI)                                 | 1.00        | 0.82 (0.55, 1.24) | 1.03 (0.70, 1.51) | 0.73 (0.47, 1.13) | 0.93 (0.60, 1.44) | 0.64    | 0.80          |
| <b>Polymers (mg/d)</b>                      |             |                   |                   |                   |                   |         |               |
| n= (cases)                                  | 7049 (51)   | 7047 (50)         | 7048 (61)         | 7047 (49)         | 7047 (35)         |         |               |
| HR (95% CI)                                 | 1.00        | 0.89 (0.60, 1.33) | 1.03 (0.71, 1.51) | 0.74 (0.50, 1.11) | 0.57 (0.36, 0.89) | 0.01    | 0.04          |
| <b>Proanthocyanidins (mg/d)<sup>2</sup></b> |             |                   |                   |                   |                   |         |               |
| n= (cases)                                  | 7049 (55)   | 7047 (46)         | 7048 (49)         | 7047 (54)         | 7047 (42)         |         |               |
| HR (95% CI)                                 | 1.00        | 0.73 (0.49, 1.09) | 0.77 (0.52, 1.14) | 0.79 (0.53, 1.18) | 0.63 (0.40, 0.98) | 0.10    | 0.03          |
| <b>Total flavonoids (mg/d)</b>              |             |                   |                   |                   |                   |         |               |
| n= (cases)                                  | 7049 (55)   | 7047 (52)         | 7048 (55)         | 7047 (44)         | 7047 (40)         |         |               |
| HR (95% CI)                                 | 1.00        | 0.88 (0.60, 1.30) | 0.84 (0.57, 1.23) | 0.64 (0.43, 0.96) | 0.61 (0.40, 0.94) | 0.01    | 0.07          |
| <b>Without depression</b>                   |             |                   |                   |                   |                   |         |               |
| <b>flavodiet score (points)<sup>1</sup></b> |             |                   |                   |                   |                   |         |               |
| n= (cases)                                  | 17222 (116) | 18295 (124)       | 16329 (118)       | 16990 (131)       | 17031 (125)       |         |               |
| HR (95% CI)                                 | 1.00        | 0.88 (0.68, 1.13) | 0.89 (0.69, 1.16) | 0.92 (0.71, 1.20) | 0.85 (0.65, 1.11) | 0.40    | -             |
| <b>Flavanones (mg/d)</b>                    |             |                   |                   |                   |                   |         |               |
| n= (cases)                                  | 17174 (120) | 17173 (111)       | 17174 (118)       | 17173 (121)       | 17173 (144)       |         |               |
| HR (95% CI)                                 | 1.00        | 0.89 (0.69, 1.15) | 0.92 (0.71, 1.20) | 0.90 (0.70, 1.17) | 1.03 (0.80, 1.32) | 0.73    | -             |
| <b>Anthocyanins (mg/d)</b>                  |             |                   |                   |                   |                   |         |               |
| n= (cases)                                  | 17174 (116) | 17173 (122)       | 17174 (131)       | 17173 (117)       | 17173 (128)       |         |               |
| HR (95% CI)                                 | 1.00        | 0.88 (0.68, 1.13) | 0.87 (0.68, 1.13) | 0.74 (0.56, 0.96) | 0.75 (0.57, 0.97) | 0.01    | -             |

|                                              |             |                   |                   |                   |                   |      |   |
|----------------------------------------------|-------------|-------------------|-------------------|-------------------|-------------------|------|---|
| <b>Flavan-3-ols (mg/d)</b>                   |             |                   |                   |                   |                   |      |   |
| n= (cases)                                   | 17174 (123) | 17173 (119)       | 17174 (135)       | 17173 (106)       | 17173 (131)       |      |   |
| HR (95% CI)                                  | 1.00        | 0.87 (0.67, 1.12) | 0.95 (0.74, 1.22) | 0.73 (0.56, 0.95) | 0.88 (0.69, 1.14) | 0.18 | - |
| <b>Flavonols (mg/d)</b>                      |             |                   |                   |                   |                   |      |   |
| n= (cases)                                   | 17174 (132) | 17173 (119)       | 17174 (102)       | 17173 (134)       | 17173 (127)       |      |   |
| HR (95% CI)                                  | 1.00        | 0.80 (0.63, 1.03) | 0.66 (0.51, 0.85) | 0.83 (0.65, 1.07) | 0.76 (0.59, 0.99) | 0.10 | - |
| <b>Flavones (mg/d)</b>                       |             |                   |                   |                   |                   |      |   |
| n= (cases)                                   | 17174 (120) | 17173 (117)       | 17174 (130)       | 17173 (138)       | 17173 (109)       |      |   |
| HR (95% CI)                                  | 1.00        | 0.85 (0.66, 1.10) | 0.89 (0.69, 1.15) | 0.92 (0.71, 1.20) | 0.70 (0.53, 0.93) | 0.06 | - |
| <b>Polymers (mg/d)</b>                       |             |                   |                   |                   |                   |      |   |
| n= (cases)                                   | 17174 (115) | 17173 (114)       | 17174 (129)       | 17173 (132)       | 17173 (124)       |      |   |
| HR (95% CI)                                  | 1.00        | 0.85 (0.66, 1.11) | 0.94 (0.73, 1.22) | 0.93 (0.72, 1.20) | 0.85 (0.65, 1.11) | 0.45 | - |
| <b>Proanthocyanidins (mg/d) <sup>2</sup></b> |             |                   |                   |                   |                   |      |   |
| n= (cases)                                   | 17174 (117) | 17173 (116)       | 17174 (115)       | 17173 (130)       | 17173 (136)       |      |   |
| HR (95% CI)                                  | 1.00        | 0.87 (0.67, 1.12) | 0.79 (0.61, 1.03) | 0.84 (0.65, 1.10) | 0.84 (0.64, 1.10) | 0.25 | - |
| <b>Total flavonoids (mg/d)</b>               |             |                   |                   |                   |                   |      |   |
| n= (cases)                                   | 17174 (124) | 17173 (111)       | 17174 (127)       | 17173 (126)       | 17173 (126)       |      |   |
| HR (95% CI)                                  | 1.00        | 0.78 (0.60, 1.01) | 0.85 (0.66, 1.10) | 0.80 (0.62, 1.03) | 0.80 (0.61, 1.03) | 0.16 | - |

Values are adjusted hazard ratios (95% CI). <sup>1</sup> flavodiet score was calculated by summing intakes (in servings per day) of tea (black and green), red wine, apples, berries, grapes, oranges, grapefruit, sweet peppers, onions, and dark chocolate. <sup>2</sup>Proanthocyanidins are also included in the polymer subclass. Models adjusted for sex (male or female), socioeconomic status (Townsend Index, categorised as low [quintile 1], moderate [quintiles 2–4], high [quintile 5] deprivation), highest level of education (higher, vocational, upper Secondary, lower Secondary, none or unknown), ethnicity (White, Mixed, Asian, Black, Chinese, other group, not answered), current smoking status (yes or no), typical sleep duration ( $\leq$  6 hours, 7–8 hours or  $>$  8 hours, not answered), physical activity (total excess metabolic equivalents, in quintiles), BMI ( $\text{kg}/\text{m}^2$ ), family history of dementia (yes or no), history of stroke (yes or no), post-menopausal status (yes, no, male or unknown), number of medications taken (1-3, 4-6, 7-9 or 10+), number of long-term health conditions (1-2, 3, 4, 5+), number of dietary assessments completed with plausible energy intakes (2, 3, 4 or 5), healthy plant-based diet index (score, in quintiles), alcohol intake not from red wine (g/d, in quintiles), energy intake (kcal/d, in quintiles) and fat intake (g/d, in quintiles) and stratified by region (London, North-West England, North-East England, Yorkshire, West Midlands, East Midlands, South-East England, South-West England, Scotland and Wales). P-interaction was calculated using all participants and refers to the interaction term between intake and indicator of hypertension (yes vs no) in the highest quintile of intake.

**eTable 9. Risk of Dementia by Quintiles of Flavodiet Score and Flavonoid Subclass Intake in 121 981 Males and Females From the UK Biobank, Stratified by Hypertension Status**

| Intake component                                             | Q1          | Q2                | Q3                | Q4                | Q5                | P-trend | P-interaction |
|--------------------------------------------------------------|-------------|-------------------|-------------------|-------------------|-------------------|---------|---------------|
| <b>Hypertensive flavodiet score (points)<sup>1</sup></b>     |             |                   |                   |                   |                   |         |               |
| n= (cases)                                                   | 10855 (110) | 10661 (107)       | 10795 (110)       | 10770 (112)       | 10613 (94)        |         |               |
| HR (95% CI)                                                  | 1.00        | 0.86 (0.66, 1.13) | 0.84 (0.64, 1.10) | 0.84 (0.64, 1.10) | 0.70 (0.52, 0.94) | 0.03    | 0.51          |
| <b>Flavanones (mg/d)</b>                                     |             |                   |                   |                   |                   |         |               |
| n= (cases)                                                   | 10739 (112) | 10739 (115)       | 10739 (92)        | 10739 (106)       | 10738 (108)       |         |               |
| HR (95% CI)                                                  | 1.00        | 1.02 (0.78, 1.33) | 0.77 (0.58, 1.02) | 0.87 (0.66, 1.14) | 0.85 (0.65, 1.11) | 0.12    | 0.20          |
| <b>Anthocyanins (mg/d)</b>                                   |             |                   |                   |                   |                   |         |               |
| n= (cases)                                                   | 10739 (99)  | 10739 (102)       | 10739 (114)       | 10739 (111)       | 10738 (107)       |         |               |
| HR (95% CI)                                                  | 1.00        | 0.86 (0.65, 1.14) | 0.91 (0.69, 1.20) | 0.84 (0.64, 1.12) | 0.81 (0.61, 1.08) | 0.18    | 0.75          |
| <b>Flavan-3-ols (mg/d)</b>                                   |             |                   |                   |                   |                   |         |               |
| n= (cases)                                                   | 10739 (117) | 10739 (104)       | 10739 (120)       | 10739 (91)        | 10738 (101)       |         |               |
| HR (95% CI)                                                  | 1.00        | 0.77 (0.59, 1.00) | 0.86 (0.66, 1.11) | 0.65 (0.49, 0.86) | 0.71 (0.54, 0.93) | 0.01    | 0.87          |
| <b>Flavonols (mg/d)</b>                                      |             |                   |                   |                   |                   |         |               |
| n= (cases)                                                   | 10739 (129) | 10739 (104)       | 10739 (94)        | 10739 (102)       | 10738 (104)       |         |               |
| HR (95% CI)                                                  | 1.00        | 0.73 (0.56, 0.94) | 0.62 (0.48, 0.82) | 0.66 (0.50, 0.86) | 0.66 (0.50, 0.87) | <0.01   | 0.37          |
| <b>Flavones (mg/d)</b>                                       |             |                   |                   |                   |                   |         |               |
| n= (cases)                                                   | 10739 (111) | 10739 (110)       | 10739 (112)       | 10739 (107)       | 10738 (93)        |         |               |
| HR (95% CI)                                                  | 1.00        | 0.84 (0.65, 1.10) | 0.85 (0.65, 1.11) | 0.81 (0.61, 1.07) | 0.69 (0.51, 0.93) | 0.03    | 0.41          |
| <b>Polymers (mg/d)</b>                                       |             |                   |                   |                   |                   |         |               |
| n= (cases)                                                   | 10739 (106) | 10739 (104)       | 10739 (122)       | 10739 (104)       | 10738 (97)        |         |               |
| HR (95% CI)                                                  | 1.00        | 0.84 (0.63, 1.10) | 0.97 (0.74, 1.26) | 0.79 (0.60, 1.05) | 0.73 (0.55, 0.97) | 0.04    | 0.50          |
| <b>Proanthocyanidins (mg/d)<sup>2</sup></b>                  |             |                   |                   |                   |                   |         |               |
| n= (cases)                                                   | 10739 (106) | 10739 (110)       | 10739 (103)       | 10739 (110)       | 10738 (104)       |         |               |
| HR (95% CI)                                                  | 1.00        | 0.89 (0.68, 1.17) | 0.77 (0.58, 1.02) | 0.80 (0.60, 1.06) | 0.72 (0.54, 0.98) | 0.03    | 0.43          |
| <b>Total flavonoids (mg/d)</b>                               |             |                   |                   |                   |                   |         |               |
| n= (cases)                                                   | 10739 (113) | 10739 (102)       | 10739 (116)       | 10739 (102)       | 10738 (100)       |         |               |
| HR (95% CI)                                                  | 1.00        | 0.77 (0.59, 1.02) | 0.83 (0.64, 1.08) | 0.72 (0.54, 0.94) | 0.70 (0.53, 0.93) | 0.01    | 0.98          |
| <b>Non-hypertensive flavodiet score (points)<sup>1</sup></b> |             |                   |                   |                   |                   |         |               |
| n= (cases)                                                   | 13928 (71)  | 13773 (62)        | 13693 (65)        | 13599 (81)        | 13294 (70)        |         |               |
| HR (95% CI)                                                  | 1.00        | 0.75 (0.53, 1.05) | 0.77 (0.54, 1.08) | 0.92 (0.66, 1.28) | 0.79 (0.55, 1.12) | 0.54    | -             |
| <b>Flavanones (mg/d)</b>                                     |             |                   |                   |                   |                   |         |               |
| n= (cases)                                                   | 13658 (64)  | 13657 (59)        | 13658 (70)        | 13657 (70)        | 13657 (86)        |         |               |
| HR (95% CI)                                                  | 1.00        | 0.89 (0.62, 1.27) | 1.05 (0.75, 1.49) | 0.98 (0.69, 1.38) | 1.16 (0.83, 1.62) | 0.27    | -             |
| <b>Anthocyanins (mg/d)</b>                                   |             |                   |                   |                   |                   |         |               |
| n= (cases)                                                   | 13658 (64)  | 13657 (70)        | 13658 (73)        | 13657 (71)        | 13657 (71)        |         |               |
| HR (95% CI)                                                  | 1.00        | 0.89 (0.63, 1.25) | 0.84 (0.59, 1.18) | 0.76 (0.54, 1.09) | 0.69 (0.48, 0.99) | 0.03    | -             |

|                                              |            |                   |                   |                   |                   |      |   |
|----------------------------------------------|------------|-------------------|-------------------|-------------------|-------------------|------|---|
| <b>Flavan-3-ols (mg/d)</b>                   |            |                   |                   |                   |                   |      |   |
| n= (cases)                                   | 13658 (76) | 13657 (72)        | 13658 (64)        | 13657 (74)        | 13657 (63)        |      |   |
| HR (95% CI)                                  | 1.00       | 0.89 (0.64, 1.24) | 0.73 (0.52, 1.02) | 0.83 (0.60, 1.15) | 0.70 (0.50, 0.99) | 0.05 | - |
| <b>Flavonols (mg/d)</b>                      |            |                   |                   |                   |                   |      |   |
| n= (cases)                                   | 13658 (74) | 13657 (63)        | 13658 (57)        | 13657 (82)        | 13657 (73)        |      |   |
| HR (95% CI)                                  | 1.00       | 0.77 (0.55, 1.08) | 0.62 (0.44, 0.89) | 0.90 (0.65, 1.25) | 0.77 (0.54, 1.08) | 0.39 | - |
| <b>Flavones (mg/d)</b>                       |            |                   |                   |                   |                   |      |   |
| n= (cases)                                   | 13658 (69) | 13657 (56)        | 13658 (76)        | 13657 (82)        | 13657 (66)        |      |   |
| HR (95% CI)                                  | 1.00       | 0.70 (0.49, 1.01) | 0.92 (0.66, 1.29) | 0.94 (0.67, 1.32) | 0.73 (0.50, 1.06) | 0.47 | - |
| <b>Polymers (mg/d)</b>                       |            |                   |                   |                   |                   |      |   |
| n= (cases)                                   | 13658 (64) | 13657 (66)        | 13658 (74)        | 13657 (77)        | 13657 (68)        |      |   |
| HR (95% CI)                                  | 1.00       | 0.93 (0.66, 1.32) | 0.99 (0.70, 1.39) | 0.96 (0.68, 1.35) | 0.86 (0.60, 1.23) | 0.50 | - |
| <b>Proanthocyanidins (mg/d) <sup>2</sup></b> |            |                   |                   |                   |                   |      |   |
| n= (cases)                                   | 13658 (70) | 13658 (58)        | 13657 (66)        | 13657 (76)        | 13657 (79)        |      |   |
| HR (95% CI)                                  | 1.00       | 0.73 (0.51, 1.04) | 0.80 (0.56, 1.13) | 0.86 (0.61, 1.21) | 0.83 (0.58, 1.18) | 0.63 | - |
| <b>Total flavonoids (mg/d)</b>               |            |                   |                   |                   |                   |      |   |
| n= (cases)                                   | 13658 (75) | 13657 (60)        | 13658 (71)        | 13657 (80)        | 13657 (63)        |      |   |
| HR (95% CI)                                  | 1.00       | 0.74 (0.52, 1.04) | 0.80 (0.57, 1.11) | 0.85 (0.62, 1.18) | 0.67 (0.47, 0.95) | 0.11 | - |

Values are adjusted hazard ratios (95% CI). <sup>1</sup> flavodiet score was calculated by summing intakes (in servings per day) of tea (black and green), red wine, apples, berries, grapes, oranges, grapefruit, sweet peppers, onions, and dark chocolate. <sup>2</sup>Proanthocyanidins are also included in the polymer subclass. Models adjusted for sex (male or female), socioeconomic status (Townsend Index, categorised as low [quintile 1], moderate [quintiles 2–4], high [quintile 5] deprivation), highest level of education (higher, vocational, upper Secondary, lower Secondary, none or unknown), ethnicity (White, Mixed, Asian, Black, Chinese, other group, not answered), current smoking status (yes or no), typical sleep duration ( $\leq 6$  hours, 7–8 hours or  $> 8$  hours, not answered), physical activity (total excess metabolic equivalents, in quintiles), BMI ( $\text{kg}/\text{m}^2$ ), family history of dementia (yes or no), history of stroke (yes or no), post-menopausal status (yes, no, male or unknown), number of medications taken (1-3, 4-6, 7-9 or 10+), number of long-term health conditions (1-2, 3, 4, 5+), number of dietary assessments completed with plausible energy intakes (2, 3, 4 or 5), healthy plant-based diet index (score, in quintiles), alcohol intake not from red wine (g/d, in quintiles), energy intake (kcal/d, in quintiles) and fat intake (g/d, in quintiles) and stratified by region (London, North-West England, North-East England, Yorkshire, West Midlands, East Midlands, South-East England, South-West England, Scotland and Wales). P-interaction was calculated using all participants and refers to the interaction term between intake and indicator of hypertension (yes vs no) in the highest quintile of intake.

**eTable 10. Risk of Dementia by Quintiles of Flavodiet Score and Flavonoid Subclass Intake in 61 719 Males and Females Aged More Than 60 Years From the UK Biobank**

| Intake component                            | Q1          | Q2                | Q3                | Q4                | Q5                | P-trend |
|---------------------------------------------|-------------|-------------------|-------------------|-------------------|-------------------|---------|
| <b>flavodiet score (points)<sup>1</sup></b> |             |                   |                   |                   |                   |         |
| n= (cases)                                  | 12794 (197) | 12156 (147)       | 12906 (181)       | 12276 (153)       | 11587 (134)       |         |
| HR (95% CI)                                 | 1.00        | 0.77 (0.62, 0.95) | 0.88 (0.72, 1.09) | 0.80 (0.64, 0.99) | 0.72 (0.57, 0.91) | 0.02    |
| <b>Flavanones (mg/d)</b>                    |             |                   |                   |                   |                   |         |
| n= (cases)                                  | 12344 (175) | 12344 (155)       | 12344 (159)       | 12344 (146)       | 12343 (177)       |         |
| HR (95% CI)                                 | 1.00        | 0.90 (0.72, 1.12) | 0.91 (0.74, 1.14) | 0.84 (0.67, 1.05) | 1.01 (0.81, 1.25) | 0.87    |
| <b>Anthocyanins (mg/d)</b>                  |             |                   |                   |                   |                   |         |
| n= (cases)                                  | 12344 (189) | 12344 (171)       | 12344 (148)       | 12344 (158)       | 12343 (146)       |         |
| HR (95% CI)                                 | 1.00        | 0.88 (0.72, 1.09) | 0.77 (0.61, 0.95) | 0.81 (0.65, 1.00) | 0.72 (0.57, 0.90) | <0.01   |
| <b>Flavan-3-ols (mg/d)</b>                  |             |                   |                   |                   |                   |         |
| n= (cases)                                  | 12344 (202) | 12344 (162)       | 12344 (161)       | 12344 (141)       | 12343 (146)       |         |
| HR (95% CI)                                 | 1.00        | 0.79 (0.64, 0.97) | 0.77 (0.63, 0.95) | 0.69 (0.55, 0.86) | 0.69 (0.55, 0.86) | <0.01   |
| <b>Flavonols (mg/d)</b>                     |             |                   |                   |                   |                   |         |
| n= (cases)                                  | 12344 (206) | 12344 (157)       | 12344 (142)       | 12344 (157)       | 12343 (150)       |         |
| HR (95% CI)                                 | 1.00        | 0.74 (0.60, 0.91) | 0.66 (0.53, 0.82) | 0.73 (0.59, 0.90) | 0.68 (0.54, 0.85) | <0.01   |
| <b>Flavones (mg/d)</b>                      |             |                   |                   |                   |                   |         |
| n= (cases)                                  | 12344 (189) | 12344 (155)       | 12344 (168)       | 12344 (159)       | 12343 (141)       |         |
| HR (95% CI)                                 | 1.00        | 0.79 (0.64, 0.98) | 0.84 (0.68, 1.04) | 0.81 (0.65, 1.01) | 0.69 (0.55, 0.88) | 0.01    |
| <b>Polymers (mg/d)</b>                      |             |                   |                   |                   |                   |         |
| n= (cases)                                  | 12344 (184) | 12344 (155)       | 12344 (184)       | 12344 (141)       | 12343 (148)       |         |
| HR (95% CI)                                 | 1.00        | 0.80 (0.64, 0.99) | 0.96 (0.78, 1.18) | 0.73 (0.58, 0.91) | 0.75 (0.60, 0.94) | 0.01    |
| <b>Proanthocyanidins (mg/d)<sup>2</sup></b> |             |                   |                   |                   |                   |         |
| n= (cases)                                  | 12344 (195) | 12344 (146)       | 12344 (153)       | 12344 (159)       | 12343 (159)       |         |
| HR (95% CI)                                 | 1.00        | 0.71 (0.57, 0.88) | 0.74 (0.60, 0.93) | 0.75 (0.60, 0.94) | 0.72 (0.57, 0.90) | 0.02    |
| <b>Total flavonoids (mg/d)</b>              |             |                   |                   |                   |                   |         |
| n= (cases)                                  | 12344 (199) | 12344 (148)       | 12344 (166)       | 12344 (147)       | 12343 (152)       |         |
| HR (95% CI)                                 | 1.00        | 0.72 (0.58, 0.90) | 0.80 (0.65, 0.98) | 0.71 (0.57, 0.88) | 0.71 (0.57, 0.89) | 0.01    |

Values are adjusted hazard ratios (95% CI), n=61,719 (812 cases). <sup>1</sup>flavodiet score was calculated by summing intakes (in servings per day) of tea (black and green), red wine, apples, berries, grapes, oranges, grapefruit, sweet peppers, onions, and dark chocolate. <sup>2</sup>Proanthocyanidins are also included in the polymer subclass. Models adjusted for sex (male or female), socioeconomic status (Townsend Index, categorised as low [quintile 1], moderate [quintiles 2–4], high [quintile 5] deprivation), highest level of education (higher, vocational, upper Secondary, lower Secondary, none or unknown), ethnicity (White, Mixed, Asian, Black, Chinese, other group, not answered), current smoking status (yes or no), typical sleep duration (≤6 hours, 7–8 hours or >8 hours, not answered), physical activity (total excess metabolic equivalents, in quintiles), BMI (kg/m<sup>2</sup>), family history of dementia (yes or no), history of stroke (yes or no), post-menopausal status (yes, no, male or unknown), number of medications taken (1-3, 4-6, 7-9 or 10+), number of long-term health conditions (1-2, 3, 4, 5+), number of dietary assessments completed with plausible energy intakes (2, 3, 4 or 5), healthy plant-based diet index (score, in quintiles), alcohol intake not from red wine (g/d, in quintiles), energy intake (kcal/d, in quintiles) and fat intake (g/d, in quintiles) and stratified by region (London, North-West England, North-East England, Yorkshire, West Midlands, East Midlands, South-East England, South-West England, Scotland and Wales).



**eTable 11. Risk of Dementia by Quintiles of Flavodiet Score and Flavonoid Subclass Intake in 120 959 Males and Females With at Least 5 Years Follow-Up From the UK Biobank**

| Intake component                            | Q1          | Q2                | Q3                | Q4                | Q5                | P-trend |
|---------------------------------------------|-------------|-------------------|-------------------|-------------------|-------------------|---------|
| <b>flavodiet score (points)<sup>1</sup></b> |             |                   |                   |                   |                   |         |
| n= (cases)                                  | 23044 (166) | 23740 (154)       | 23787 (161)       | 24417 (189)       | 25971 (173)       |         |
| HR (95% CI)                                 | 1.00        | 0.79 (0.63, 0.98) | 0.76 (0.61, 0.95) | 0.87 (0.70, 1.08) | 0.71 (0.56, 0.89) | 0.03    |
| <b>Flavanones (mg/d)</b>                    |             |                   |                   |                   |                   |         |
| n= (cases)                                  | 24193 (165) | 24192 (166)       | 24191 (159)       | 24192 (163)       | 24191 (190)       |         |
| HR (95% CI)                                 | 1.00        | 0.97 (0.78, 1.21) | 0.90 (0.72, 1.12) | 0.89 (0.71, 1.11) | 0.99 (0.80, 1.23) | 0.73    |
| <b>Anthocyanins (mg/d)</b>                  |             |                   |                   |                   |                   |         |
| n= (cases)                                  | 24193 (150) | 24192 (167)       | 24191 (167)       | 24192 (180)       | 24191 (179)       |         |
| HR (95% CI)                                 | 1.00        | 0.92 (0.74, 1.15) | 0.85 (0.68, 1.07) | 0.86 (0.68, 1.07) | 0.80 (0.64, 1.00) | 0.05    |
| <b>Flavan-3-ols (mg/d)</b>                  |             |                   |                   |                   |                   |         |
| n= (cases)                                  | 24193 (186) | 24192 (163)       | 24191 (181)       | 24192 (152)       | 24191 (161)       |         |
| HR (95% CI)                                 | 1.00        | 0.79 (0.64, 0.97) | 0.82 (0.67, 1.01) | 0.68 (0.55, 0.85) | 0.71 (0.57, 0.89) | <0.01   |
| <b>Flavonols (mg/d)</b>                     |             |                   |                   |                   |                   |         |
| n= (cases)                                  | 24193 (185) | 24192 (166)       | 24191 (143)       | 24192 (177)       | 24191 (172)       |         |
| HR (95% CI)                                 | 1.00        | 0.80 (0.64, 0.98) | 0.64 (0.51, 0.80) | 0.77 (0.62, 0.95) | 0.72 (0.58, 0.90) | 0.01    |
| <b>Flavones (mg/d)</b>                      |             |                   |                   |                   |                   |         |
| n= (cases)                                  | 24193 (171) | 24192 (153)       | 24191 (181)       | 24192 (181)       | 24191 (157)       |         |
| HR (95% CI)                                 | 1.00        | 0.77 (0.62, 0.96) | 0.88 (0.71, 1.09) | 0.86 (0.69, 1.07) | 0.73 (0.57, 0.92) | 0.06    |
| <b>Polymers (mg/d)</b>                      |             |                   |                   |                   |                   |         |
| n= (cases)                                  | 24193 (161) | 24192 (163)       | 24191 (185)       | 24192 (177)       | 24191 (157)       |         |
| HR (95% CI)                                 | 1.00        | 0.88 (0.71, 1.10) | 0.96 (0.78, 1.19) | 0.87 (0.70, 1.09) | 0.76 (0.61, 0.96) | 0.04    |
| <b>Proanthocyanidins (mg/d)<sup>2</sup></b> |             |                   |                   |                   |                   |         |
| n= (cases)                                  | 24193 (169) | 24192 (158)       | 24191 (166)       | 24192 (172)       | 24191 (178)       |         |
| HR (95% CI)                                 | 1.00        | 0.81 (0.65, 1.01) | 0.79 (0.64, 0.99) | 0.77 (0.62, 0.97) | 0.76 (0.60, 0.96) | 0.03    |
| <b>Total flavonoids (mg/d)</b>              |             |                   |                   |                   |                   |         |
| n= (cases)                                  | 24193 (180) | 24192 (153)       | 24191 (177)       | 24192 (172)       | 24191 (161)       |         |
| HR (95% CI)                                 | 1.00        | 0.75 (0.60, 0.93) | 0.80 (0.65, 0.99) | 0.75 (0.60, 0.92) | 0.69 (0.56, 0.87) | <0.01   |

Values are adjusted hazard ratios (95% CI), n=120,959 (843 cases). <sup>1</sup> flavodiet score was calculated by summing intakes (in servings per day) of tea (black and green), red wine, apples, berries, grapes, oranges, grapefruit, sweet peppers, onions, and dark chocolate. <sup>2</sup>Proanthocyanidins are also included in the polymer subclass. Models adjusted for sex (male or female), socioeconomic status (Townsend Index, categorised as low [quintile 1], moderate [quintiles 2–4], high [quintile 5] deprivation), highest level of education (higher, vocational, upper Secondary, lower Secondary, none or unknown), ethnicity (White, Mixed, Asian, Black, Chinese, other group, not answered), current smoking status (yes or no), typical sleep duration (≤6 hours, 7–8 hours or >8 hours, not answered), physical activity (total excess metabolic equivalents, in quintiles), BMI (kg/m<sup>2</sup>), family history of dementia (yes or no), history of stroke (yes or no), post-menopausal status (yes, no, male or unknown), number of medications taken (1-3, 4-6, 7-9 or 10+), number of long-term health conditions (1-2, 3, 4, 5+), number of dietary assessments completed with plausible energy intakes (2, 3, 4 or 5), healthy plant-based diet index (score, in quintiles), alcohol intake not from red wine (g/d, in quintiles), energy intake (kcal/d, in quintiles) and fat intake (g/d, in quintiles) and stratified by region (London, North-West England, North-East England, Yorkshire, West Midlands, East Midlands, South-East England, South-West England, Scotland and Wales).

**eTable 12. Risk of Dementia by Quintiles of Flavodiet Score and Flavonoid Subclass Intake in 119 053 Males and Females With No Reported Stroke History From the UK Biobank**

| Intake component                            | Q1          | Q2                | Q3                | Q4                | Q5                | P-trend |
|---------------------------------------------|-------------|-------------------|-------------------|-------------------|-------------------|---------|
| <b>flavodiet score (points)<sup>1</sup></b> |             |                   |                   |                   |                   |         |
| n= (cases)                                  | 24505 (163) | 23148 (146)       | 24554 (165)       | 23082 (168)       | 23764 (146)       |         |
| HR (95% CI)                                 | 1.00        | 0.80 (0.64, 1.00) | 0.81 (0.65, 1.02) | 0.84 (0.68, 1.06) | 0.71 (0.56, 0.90) | 0.02    |
| <b>Flavanones (mg/d)</b>                    |             |                   |                   |                   |                   |         |
| n= (cases)                                  | 23811 (157) | 23811 (152)       | 23811 (142)       | 23811 (158)       | 23809 (179)       |         |
| HR (95% CI)                                 | 1.00        | 0.93 (0.74, 1.17) | 0.85 (0.67, 1.07) | 0.90 (0.72, 1.13) | 0.97 (0.78, 1.21) | 0.75    |
| <b>Anthocyanins (mg/d)</b>                  |             |                   |                   |                   |                   |         |
| n= (cases)                                  | 23811 (139) | 23811 (161)       | 23811 (159)       | 23811 (169)       | 23809 (160)       |         |
| HR (95% CI)                                 | 1.00        | 0.92 (0.73, 1.16) | 0.87 (0.69, 1.09) | 0.85 (0.67, 1.07) | 0.75 (0.59, 0.95) | 0.01    |
| <b>Flavan-3-ols (mg/d)</b>                  |             |                   |                   |                   |                   |         |
| n= (cases)                                  | 23811 (168) | 23811 (156)       | 23811 (168)       | 23811 (150)       | 23809 (146)       |         |
| HR (95% CI)                                 | 1.00        | 0.83 (0.66, 1.03) | 0.83 (0.67, 1.04) | 0.73 (0.58, 0.91) | 0.72 (0.57, 0.91) | <0.01   |
| <b>Flavonols (mg/d)</b>                     |             |                   |                   |                   |                   |         |
| n= (cases)                                  | 23811 (172) | 23811 (156)       | 23811 (138)       | 23811 (162)       | 23809 (160)       |         |
| HR (95% CI)                                 | 1.00        | 0.80 (0.65, 1.00) | 0.66 (0.53, 0.83) | 0.74 (0.60, 0.93) | 0.73 (0.58, 0.92) | 0.01    |
| <b>Flavones (mg/d)</b>                      |             |                   |                   |                   |                   |         |
| n= (cases)                                  | 23811 (162) | 23811 (150)       | 23811 (168)       | 23811 (167)       | 23809 (141)       |         |
| HR (95% CI)                                 | 1.00        | 0.80 (0.64, 1.00) | 0.86 (0.69, 1.07) | 0.82 (0.65, 1.03) | 0.68 (0.53, 0.87) | 0.01    |
| <b>Polymers (mg/d)</b>                      |             |                   |                   |                   |                   |         |
| n= (cases)                                  | 23811 (145) | 23811 (158)       | 23811 (175)       | 23811 (166)       | 23809 (144)       |         |
| HR (95% CI)                                 | 1.00        | 0.94 (0.75, 1.18) | 1.00 (0.80, 1.25) | 0.90 (0.71, 1.13) | 0.79 (0.62, 1.00) | 0.05    |
| <b>Proanthocyanidins (mg/d)<sup>2</sup></b> |             |                   |                   |                   |                   |         |
| n= (cases)                                  | 23811 (154) | 23811 (147)       | 23811 (157)       | 23811 (161)       | 23809 (169)       |         |
| HR (95% CI)                                 | 1.00        | 0.82 (0.66, 1.04) | 0.82 (0.65, 1.03) | 0.80 (0.63, 1.01) | 0.80 (0.63, 1.02) | 0.10    |
| <b>Total flavonoids (mg/d)</b>              |             |                   |                   |                   |                   |         |
| n= (cases)                                  | 23811 (164) | 23811 (144)       | 23811 (167)       | 23811 (165)       | 23809 (148)       |         |
| HR (95% CI)                                 | 1.00        | 0.77 (0.61, 0.96) | 0.83 (0.67, 1.03) | 0.77 (0.62, 0.96) | 0.71 (0.56, 0.89) | 0.01    |

Values are adjusted hazard ratios (95% CI), n=119,053 (788 cases). <sup>1</sup> flavodiet score was calculated by summing intakes (in servings per day) of tea (black and green), red wine, apples, berries, grapes, oranges, grapefruit, sweet peppers, onions, and dark chocolate. <sup>2</sup>Proanthocyanidins are also included in the polymer subclass. Models adjusted for sex (male or female), socioeconomic status (Townsend Index, categorised as low [quintile 1], moderate [quintiles 2–4], high [quintile 5] deprivation), highest level of education (higher, vocational, upper Secondary, lower Secondary, none or unknown), ethnicity (White, Mixed, Asian, Black, Chinese, other group, not answered), current smoking status (yes or no), typical sleep duration (≤6 hours, 7–8 hours or >8 hours, not answered), physical activity (total excess metabolic equivalents, in quintiles), BMI (kg/m<sup>2</sup>), family history of dementia (yes or no), post-menopausal status (yes, no, male or unknown), number of medications taken (1-3, 4-6, 7-9 or 10+), number of long-term health conditions (1-2, 3, 4, 5+), number of dietary assessments completed with plausible energy intakes (2, 3, 4 or 5), healthy plant-based diet index (score, in quintiles), alcohol intake not from red wine (g/d, in quintiles), energy intake (kcal/d, in quintiles) and fat intake (g/d, in quintiles) and stratified by region (London, North-West England, North-East England, Yorkshire, West Midlands, East Midlands, South-East England, South-West England, Scotland and Wales).

**eTable 13. Risk of Dementia by Quintiles of Flavodiet Score and Flavonoid Subclass Intake in 35 110 Males and Females At High Genetic Risk of Dementia Whose Reported Ethnicity Was White From the UK Biobank**

| Intake component                            | Q1         | Q2                | Q3                | Q4                | Q5                | P-trend |
|---------------------------------------------|------------|-------------------|-------------------|-------------------|-------------------|---------|
| <b>flavodiet score (points)<sup>1</sup></b> |            |                   |                   |                   |                   |         |
| n= (cases)                                  | 7128 (109) | 7277 (86)         | 6854 (86)         | 7226 (96)         | 6625 (75)         |         |
| HR (95% CI)                                 | 1.00       | 0.64 (0.48, 0.86) | 0.66 (0.50, 0.88) | 0.69 (0.51, 0.91) | 0.59 (0.43, 0.82) | 0.01    |
| <b>Flavanones (mg/d)</b>                    |            |                   |                   |                   |                   |         |
| n= (cases)                                  | 7023 (90)  | 7022 (81)         | 7022 (90)         | 7022 (86)         | 7021 (105)        |         |
| HR (95% CI)                                 | 1.00       | 0.89 (0.65, 1.20) | 0.93 (0.69, 1.25) | 0.86 (0.64, 1.17) | 0.99 (0.74, 1.33) | 0.96    |
| <b>Anthocyanins (mg/d)</b>                  |            |                   |                   |                   |                   |         |
| n= (cases)                                  | 7023 (94)  | 7022 (84)         | 7022 (101)        | 7022 (93)         | 7021 (80)         |         |
| HR (95% CI)                                 | 1.00       | 0.72 (0.53, 0.97) | 0.82 (0.62, 1.10) | 0.71 (0.52, 0.95) | 0.60 (0.44, 0.82) | <0.01   |
| <b>Flavan-3-ols (mg/d)</b>                  |            |                   |                   |                   |                   |         |
| n= (cases)                                  | 7023 (111) | 7022 (90)         | 7022 (94)         | 7022 (82)         | 7021 (75)         |         |
| HR (95% CI)                                 | 1.00       | 0.70 (0.53, 0.93) | 0.72 (0.55, 0.95) | 0.61 (0.46, 0.82) | 0.58 (0.43, 0.78) | <0.01   |
| <b>Flavonols (mg/d)</b>                     |            |                   |                   |                   |                   |         |
| n= (cases)                                  | 7023 (114) | 7022 (96)         | 7022 (69)         | 7022 (87)         | 7021 (86)         |         |
| HR (95% CI)                                 | 1.00       | 0.71 (0.54, 0.94) | 0.50 (0.37, 0.68) | 0.61 (0.45, 0.81) | 0.60 (0.44, 0.80) | <0.01   |
| <b>Flavones (mg/d)</b>                      |            |                   |                   |                   |                   |         |
| n= (cases)                                  | 7023 (91)  | 7022 (86)         | 7022 (95)         | 7022 (96)         | 7021 (84)         |         |
| HR (95% CI)                                 | 1.00       | 0.83 (0.61, 1.11) | 0.86 (0.64, 1.15) | 0.90 (0.66, 1.21) | 0.78 (0.56, 1.08) | 0.29    |
| <b>Polymers (mg/d)</b>                      |            |                   |                   |                   |                   |         |
| n= (cases)                                  | 7023 (98)  | 7022 (91)         | 7022 (99)         | 7022 (86)         | 7021 (78)         |         |
| HR (95% CI)                                 | 1.00       | 0.75 (0.56, 1.00) | 0.84 (0.63, 1.12) | 0.67 (0.50, 0.90) | 0.63 (0.46, 0.86) | <0.01   |
| <b>Proanthocyanidins (mg/d)<sup>2</sup></b> |            |                   |                   |                   |                   |         |
| n= (cases)                                  | 7023 (103) | 7022 (92)         | 7022 (92)         | 7022 (80)         | 7021 (85)         |         |
| HR (95% CI)                                 | 1.00       | 0.78 (0.58, 1.03) | 0.73 (0.55, 0.97) | 0.60 (0.44, 0.81) | 0.61 (0.44, 0.83) | <0.01   |
| <b>Total flavonoids (mg/d)</b>              |            |                   |                   |                   |                   |         |
| n= (cases)                                  | 7023 (113) | 7022 (80)         | 7022 (95)         | 7022 (85)         | 7021 (79)         |         |
| HR (95% CI)                                 | 1.00       | 0.59 (0.44, 0.79) | 0.69 (0.52, 0.91) | 0.58 (0.43, 0.78) | 0.57 (0.42, 0.77) | <0.01   |

Values are adjusted hazard ratios (95% CI), n=35,110 (452 cases). <sup>1</sup> flavodiet score was calculated by summing intakes (in servings per day) of tea (black and green), red wine, apples, berries, grapes, oranges, grapefruit, sweet peppers, onions, and dark chocolate. <sup>2</sup>Proanthocyanidins are also included in the polymer subclass. Models adjusted for sex (male or female), socioeconomic status (Townsend Index, categorised as low [quintile 1], moderate [quintiles 2–4], high [quintile 5] deprivation), highest level of education (higher, vocational, upper Secondary, lower Secondary, none or unknown), ethnicity (White, Mixed, Asian, Black, Chinese, other group, not answered), current smoking status (yes or no), typical sleep duration (≤6 hours, 7–8 hours or >8 hours, not answered), physical activity (total excess metabolic equivalents, in quintiles), BMI (kg/m<sup>2</sup>), family history of dementia (yes or no), history of stroke (yes or no), post-menopausal status (yes, no, male or unknown), number of medications taken (1-3, 4-6, 7-9 or 10+), number of long-term health conditions (1-2, 3, 4, 5+), genetic kinship (at least one relative, no kinship, unknown), number of dietary assessments completed with plausible energy intakes (2, 3, 4 or 5), healthy plant-based diet index (score, in quintiles), alcohol intake not from red wine (g/d, in quintiles), energy intake (kcal/d, in quintiles) and fat intake (g/d, in quintiles) and stratified by region (London, North-West England, North-East England, Yorkshire, West Midlands, East Midlands, South-East England, South-West England, Scotland and Wales).

**eTable 14. Risk of Dementia by Quintiles of Flavodiet Score and Flavonoid Subclass Intake in 121 986 Males and Females From the UK Biobank Adjusted for Individual Foods Associated With Dementia Risk)**

| Intake component                            | Q1          | Q2                | Q3                | Q4                | Q5                | P-trend |
|---------------------------------------------|-------------|-------------------|-------------------|-------------------|-------------------|---------|
| <b>flavodiet score (points)<sup>1</sup></b> |             |                   |                   |                   |                   |         |
| n= (cases)                                  | 23264 (173) | 23944 (161)       | 24004 (173)       | 24605 (194)       | 26169 (181)       |         |
| HR (95% CI)                                 | 1.00        | 0.78 (0.63, 0.97) | 0.78 (0.63, 0.97) | 0.85 (0.68, 1.06) | 0.71 (0.57, 0.90) | 0.03    |
| <b>Flavanones (mg/d)</b>                    |             |                   |                   |                   |                   |         |
| n= (cases)                                  | 24399 (177) | 24396 (171)       | 24397 (165)       | 24397 (171)       | 24397 (198)       |         |
| HR (95% CI)                                 | 1.00        | 0.95 (0.76, 1.17) | 0.89 (0.72, 1.10) | 0.89 (0.72, 1.10) | 0.99 (0.81, 1.22) | 0.79    |
| <b>Anthocyanins (mg/d)</b>                  |             |                   |                   |                   |                   |         |
| n= (cases)                                  | 24398 (160) | 24397 (173)       | 24397 (179)       | 24397 (186)       | 24397 (184)       |         |
| HR (95% CI)                                 | 1.00        | 0.91 (0.73, 1.13) | 0.88 (0.71, 1.09) | 0.87 (0.70, 1.08) | 0.82 (0.66, 1.03) | 0.09    |
| <b>Flavan-3-ols (mg/d)</b>                  |             |                   |                   |                   |                   |         |
| n= (cases)                                  | 24398 (193) | 24397 (171)       | 24397 (188)       | 24397 (163)       | 24397 (167)       |         |
| HR (95% CI)                                 | 1.00        | 0.78 (0.63, 0.96) | 0.79 (0.64, 0.98) | 0.68 (0.54, 0.85) | 0.68 (0.54, 0.86) | <0.01   |
| <b>Flavonols (mg/d)</b>                     |             |                   |                   |                   |                   |         |
| n= (cases)                                  | 24398 (193) | 24397 (175)       | 24397 (149)       | 24397 (186)       | 24397 (179)       |         |
| HR (95% CI)                                 | 1.00        | 0.80 (0.65, 0.99) | 0.64 (0.51, 0.79) | 0.77 (0.62, 0.95) | 0.72 (0.58, 0.91) | 0.01    |
| <b>Flavones (mg/d)</b>                      |             |                   |                   |                   |                   |         |
| n= (cases)                                  | 24398 (181) | 24397 (164)       | 24397 (189)       | 24397 (187)       | 24397 (161)       |         |
| HR (95% CI)                                 | 1.00        | 0.80 (0.65, 1.00) | 0.90 (0.73, 1.11) | 0.88 (0.72, 1.09) | 0.76 (0.61, 0.95) | 0.08    |
| <b>Polymers (mg/d)</b>                      |             |                   |                   |                   |                   |         |
| n= (cases)                                  | 24398 (169) | 24397 (168)       | 24397 (195)       | 24397 (185)       | 24397 (165)       |         |
| HR (95% CI)                                 | 1.00        | 0.87 (0.70, 1.08) | 0.96 (0.78, 1.19) | 0.86 (0.69, 1.07) | 0.75 (0.59, 0.95) | 0.03    |
| <b>Proanthocyanidins (mg/d)<sup>2</sup></b> |             |                   |                   |                   |                   |         |
| n= (cases)                                  | 24398 (176) | 24397 (167)       | 24397 (171)       | 24397 (181)       | 24397 (187)       |         |
| HR (95% CI)                                 | 1.00        | 0.83 (0.67, 1.03) | 0.79 (0.64, 0.99) | 0.79 (0.64, 0.99) | 0.79 (0.63, 0.99) | 0.07    |
| <b>Total flavonoids (mg/d)</b>              |             |                   |                   |                   |                   |         |
| n= (cases)                                  | 24398 (188) | 24397 (156)       | 24397 (189)       | 24397 (179)       | 24397 (170)       |         |
| HR (95% CI)                                 | 1.00        | 0.73 (0.59, 0.90) | 0.81 (0.66, 1.00) | 0.73 (0.59, 0.91) | 0.69 (0.54, 0.86) | 0.01    |

Values are adjusted hazard ratios (95% CI), n=121,986 (882 cases). <sup>1</sup> flavodiet score was calculated by summing intakes (in servings per day) of tea (black and green), red wine, apples, berries, grapes, oranges, grapefruit, sweet peppers, onions, and dark chocolate. <sup>2</sup>Proanthocyanidins are also included in the polymer subclass. Models adjusted for sex (male or female), socioeconomic status (Townsend Index, categorised as low [quintile 1], moderate [quintiles 2–4], high [quintile 5] deprivation), highest level of education (higher, vocational, upper Secondary, lower Secondary, none or unknown), ethnicity (White, Mixed, Asian, Black, Chinese, other group, not answered), current smoking status (yes or no), typical sleep duration (≤6 hours, 7–8 hours or >8 hours, not answered), physical activity (total excess metabolic equivalents, in quintiles), BMI (kg/m<sup>2</sup>), family history of dementia (yes or no), history of stroke (yes or no), post-menopausal status (yes, no, male or unknown), number of medications taken (1-3, 4-6, 7-9 or 10+), number of long-term health conditions (1-2, 3, 4, 5+), number of dietary assessments completed with plausible energy intakes (2, 3, 4 or 5), intakes of red and processed meats, oily fish, coffee, high sugar foods and drinks, alcohol not from red wine, fat (all g/d, in quintiles), energy intake (kcal/d, in quintiles) and stratified by region (London, North-West England, North-East England, Yorkshire, West Midlands, East Midlands, South-East England, South-West England, Scotland and Wales).

**eTable 15. Risk of Dementia by Quintiles of Flavodiet Score and Flavonoid Subclass Intake in 53 101 Males and Females From the UK Biobank Living in High Areas of Deprivation or With Low Levels of Education**

| Intake component                            | Q1         | Q2                | Q3                | Q4                | Q5                | P-trend |
|---------------------------------------------|------------|-------------------|-------------------|-------------------|-------------------|---------|
| <b>flavodiet score (points)<sup>1</sup></b> |            |                   |                   |                   |                   |         |
| n= (cases)                                  | 10802 (88) | 11322 (91)        | 9926 (81)         | 10613 (93)        | 10438 (85)        |         |
| HR (95% CI)                                 | 1.00       | 0.83 (0.62, 1.12) | 0.78 (0.57, 1.06) | 0.81 (0.60, 1.09) | 0.74 (0.54, 1.02) | 0.09    |
| <b>Flavanones (mg/d)</b>                    |            |                   |                   |                   |                   |         |
| n= (cases)                                  | 10621 (95) | 10620 (89)        | 10620 (73)        | 10620 (79)        | 10620 (102)       |         |
| HR (95% CI)                                 | 1.00       | 0.87 (0.65, 1.17) | 0.72 (0.53, 0.98) | 0.72 (0.53, 0.98) | 0.89 (0.67, 1.19) | 0.26    |
| <b>Anthocyanins (mg/d)</b>                  |            |                   |                   |                   |                   |         |
| n= (cases)                                  | 10621 (77) | 10620 (82)        | 10620 (96)        | 10620 (90)        | 10620 (93)        |         |
| HR (95% CI)                                 | 1.00       | 0.86 (0.63, 1.18) | 0.93 (0.69, 1.27) | 0.82 (0.60, 1.12) | 0.82 (0.60, 1.13) | 0.24    |
| <b>Flavan-3-ols (mg/d)</b>                  |            |                   |                   |                   |                   |         |
| n= (cases)                                  | 10621 (93) | 10620 (86)        | 10620 (101)       | 10620 (76)        | 10620 (82)        |         |
| HR (95% CI)                                 | 1.00       | 0.83 (0.61, 1.11) | 0.89 (0.67, 1.18) | 0.66 (0.49, 0.90) | 0.69 (0.51, 0.94) | 0.01    |
| <b>Flavonols (mg/d)</b>                     |            |                   |                   |                   |                   |         |
| n= (cases)                                  | 10621 (95) | 10620 (85)        | 10620 (80)        | 10620 (91)        | 10620 (87)        |         |
| HR (95% CI)                                 | 1.00       | 0.80 (0.59, 1.07) | 0.68 (0.50, 0.92) | 0.75 (0.56, 1.01) | 0.69 (0.51, 0.94) | 0.03    |
| <b>Flavones (mg/d)</b>                      |            |                   |                   |                   |                   |         |
| n= (cases)                                  | 10621 (84) | 10620 (94)        | 10620 (93)        | 10620 (86)        | 10620 (81)        |         |
| HR (95% CI)                                 | 1.00       | 0.94 (0.70, 1.27) | 0.86 (0.63, 1.17) | 0.81 (0.59, 1.12) | 0.77 (0.55, 1.08) | 0.09    |
| <b>Polymers (mg/d)</b>                      |            |                   |                   |                   |                   |         |
| n= (cases)                                  | 10621 (83) | 10620 (83)        | 10620 (98)        | 10620 (93)        | 10620 (81)        |         |
| HR (95% CI)                                 | 1.00       | 0.91 (0.67, 1.24) | 0.98 (0.73, 1.32) | 0.86 (0.64, 1.16) | 0.74 (0.54, 1.02) | 0.06    |
| <b>Proanthocyanidins (mg/d)<sup>2</sup></b> |            |                   |                   |                   |                   |         |
| n= (cases)                                  | 10621 (88) | 10620 (79)        | 10620 (83)        | 10620 (89)        | 10620 (99)        |         |
| HR (95% CI)                                 | 1.00       | 0.76 (0.56, 1.04) | 0.75 (0.55, 1.02) | 0.75 (0.55, 1.02) | 0.81 (0.59, 1.11) | 0.27    |
| <b>Total flavonoids (mg/d)</b>              |            |                   |                   |                   |                   |         |
| n= (cases)                                  | 10621 (91) | 10620 (80)        | 10620 (95)        | 10620 (91)        | 10620 (81)        |         |
| HR (95% CI)                                 | 1.00       | 0.79 (0.58, 1.07) | 0.84 (0.63, 1.13) | 0.76 (0.57, 1.03) | 0.66 (0.49, 0.91) | 0.02    |

Values are adjusted hazard ratios (95% CI) in participants living in areas of high deprivation [Townsend Index quintile 5] (n= 24,309) or with low levels of education [highest level of education lower Secondary or none] (n=28,792, n=53,101 (438 cases). <sup>1</sup> flavodiet score was calculated by summing intakes (in servings per day) of tea (black and green), red wine, apples, berries, grapes, oranges, grapefruit, sweet peppers, onions, and dark chocolate. <sup>2</sup>Proanthocyanidins are also included in the polymer subclass. Models adjusted for sex (male or female), ethnicity (White, Mixed, Asian, Black, Chinese, other group, not answered), current smoking status (yes or no), typical sleep duration (≤ 6 hours, 7–8 hours or > 8 hours, not answered), physical activity (total excess metabolic equivalents, in quintiles), BMI (kg/m<sup>2</sup>), family history of dementia (yes or no), history of stroke (yes or no), post-menopausal status (yes, no, male or unknown), number of medications taken (1-3, 4-6, 7-9 or 10+), number of long-term health conditions (1-2, 3, 4, 5+), number of dietary assessments completed with plausible energy intakes (2, 3, 4 or 5), intakes of red and processed meats, oily fish, coffee, high sugar foods and drinks, alcohol not from red wine, fat (all g/d, in quintiles), energy intake (kcal/d, in quintiles) and stratified by region (London, North-West England, North-East England, Yorkshire, West Midlands, East Midlands, South-East England, South-West England, Scotland and Wales).

**eTable 16. Risk of Dementia by Quintiles of Flavodiet Score and Flavonoid Subclass Intake in 73 200 Males and Females From the UK Biobank With Low or Moderate Levels of Physical Activity**

| Intake component                            | Q1          | Q2                | Q3                | Q4                | Q5                | P-trend |
|---------------------------------------------|-------------|-------------------|-------------------|-------------------|-------------------|---------|
| <b>flavodiet score (points)<sup>1</sup></b> |             |                   |                   |                   |                   |         |
| n= (cases)                                  | 15516 (115) | 14410 (105)       | 14941 (110)       | 14486 (131)       | 13847 (87)        |         |
| HR (95% CI)                                 | 1.00        | 0.84 (0.64, 1.10) | 0.83 (0.64, 1.08) | 0.97 (0.74, 1.25) | 0.67 (0.50, 0.90) | 0.07    |
| <b>Flavanones (mg/d)</b>                    |             |                   |                   |                   |                   |         |
| n= (cases)                                  | 14641 (102) | 14640 (115)       | 14640 (109)       | 14640 (98)        | 14639 (124)       |         |
| HR (95% CI)                                 | 1.00        | 1.07 (0.81, 1.40) | 0.97 (0.74, 1.28) | 0.83 (0.63, 1.10) | 1.01 (0.77, 1.33) | 0.50    |
| <b>Anthocyanins (mg/d)</b>                  |             |                   |                   |                   |                   |         |
| n= (cases)                                  | 14641 (100) | 14640 (108)       | 14640 (108)       | 14640 (117)       | 14639 (115)       |         |
| HR (95% CI)                                 | 1.00        | 0.90 (0.68, 1.19) | 0.82 (0.62, 1.08) | 0.83 (0.63, 1.10) | 0.76 (0.57, 1.01) | 0.06    |
| <b>Flavan-3-ols (mg/d)</b>                  |             |                   |                   |                   |                   |         |
| n= (cases)                                  | 14641 (124) | 14640 (114)       | 14640 (104)       | 14640 (102)       | 14639 (104)       |         |
| HR (95% CI)                                 | 1.00        | 0.82 (0.64, 1.06) | 0.72 (0.55, 0.93) | 0.70 (0.54, 0.92) | 0.71 (0.54, 0.92) | 0.01    |
| <b>Flavonols (mg/d)</b>                     |             |                   |                   |                   |                   |         |
| n= (cases)                                  | 14641 (125) | 14640 (101)       | 14640 (90)        | 14640 (124)       | 14639 (108)       |         |
| HR (95% CI)                                 | 1.00        | 0.72 (0.55, 0.94) | 0.60 (0.45, 0.79) | 0.83 (0.64, 1.08) | 0.70 (0.53, 0.92) | 0.07    |
| <b>Flavones (mg/d)</b>                      |             |                   |                   |                   |                   |         |
| n= (cases)                                  | 14641 (108) | 14640 (103)       | 14640 (116)       | 14640 (119)       | 14639 (102)       |         |
| HR (95% CI)                                 | 1.00        | 0.81 (0.62, 1.07) | 0.88 (0.67, 1.15) | 0.87 (0.67, 1.15) | 0.75 (0.56, 1.01) | 0.17    |
| <b>Polymers (mg/d)</b>                      |             |                   |                   |                   |                   |         |
| n= (cases)                                  | 14641 (115) | 14640 (102)       | 14640 (117)       | 14640 (112)       | 14639 (102)       |         |
| HR (95% CI)                                 | 1.00        | 0.79 (0.60, 1.03) | 0.88 (0.67, 1.14) | 0.79 (0.61, 1.04) | 0.73 (0.55, 0.96) | 0.05    |
| <b>Proanthocyanidins (mg/d)<sup>2</sup></b> |             |                   |                   |                   |                   |         |
| n= (cases)                                  | 14641 (121) | 14640 (98)        | 14640 (104)       | 14640 (113)       | 14639 (112)       |         |
| HR (95% CI)                                 | 1.00        | 0.71 (0.54, 0.93) | 0.71 (0.54, 0.92) | 0.71 (0.54, 0.93) | 0.68 (0.52, 0.91) | 0.02    |
| <b>Total flavonoids (mg/d)</b>              |             |                   |                   |                   |                   |         |
| n= (cases)                                  | 14641 (120) | 14640 (104)       | 14640 (108)       | 14640 (114)       | 14639 (102)       |         |
| HR (95% CI)                                 | 1.00        | 0.78 (0.59, 1.01) | 0.75 (0.58, 0.98) | 0.76 (0.59, 0.99) | 0.69 (0.53, 0.92) | 0.02    |

Values are adjusted hazard ratios (95% CI) in participants with low or moderate levels of physical activity [total excess metabolic equivalents, quintiles 1-3], n=73,200 (548 cases). <sup>1</sup> flavodiet score was calculated by summing intakes (in servings per day) of tea (black and green), red wine, apples, berries, grapes, oranges, grapefruit, sweet peppers, onions, and dark chocolate.

<sup>2</sup>Proanthocyanidins are also included in the polymer subclass. Models adjusted for sex (male or female), socioeconomic status (Townsend Index, categorised as low [quintile 1], moderate [quintiles 2-4], high [quintile 5] deprivation), highest level of education (higher, vocational, upper Secondary, lower Secondary, none or unknown), ethnicity (White, Mixed, Asian, Black, Chinese, other group, not answered), current smoking status (yes or no), typical sleep duration ( $\leq 6$  hours, 7-8 hours or  $> 8$  hours, not answered), BMI (kg/m<sup>2</sup>), family history of dementia (yes or no), history of stroke (yes or no), post-menopausal status (yes, no, male or unknown), number of medications taken (1-3, 4-6, 7-9 or 10+), number of long-term health conditions (1-2, 3, 4, 5+), number of dietary assessments completed with plausible energy intakes (2, 3, 4 or 5), intakes of red and processed meats, oily fish, coffee, high sugar foods and drinks, alcohol not from red wine, fat (all g/d, in quintiles), energy intake (kcal/d, in quintiles) and stratified by region (London, North-West England, North-East England, Yorkshire, West Midlands, East Midlands, South-East England, South-West England, Scotland and Wales).

## eReferences

1. Thompson AS, Tresserra-Rimbau A, Karavasiloglou N, et al. Association of Healthful Plant-based Diet Adherence With Risk of Mortality and Major Chronic Diseases Among Adults in the UK. *JAMA Netw Open*. Mar 1 2023;6(3):e234714. doi:10.1001/jamanetworkopen.2023.4714
2. Bycroft C, Freeman C, Petkova D, et al. The UK Biobank resource with deep phenotyping and genomic data. *Nature*. 2018/10/01 2018;562(7726):203-209. doi:10.1038/s41586-018-0579-z
3. Thompson D, Wells D, Selzam S, et al. UK Biobank release and systematic evaluation of optimised polygenic risk scores for 53 diseases and quantitative traits. medRxiv; 2022.
4. Lourida I, Hannon E, Littlejohns TJ, et al. Association of Lifestyle and Genetic Risk With Incidence of Dementia. *JAMA : the journal of the American Medical Association*. Jul 14 2019;doi:10.1001/jama.2019.9879
5. de Lange A-MG, Kaufmann T, Quintana DS, et al. Prominent health problems, socioeconomic deprivation, and higher brain age in lonely and isolated individuals: A population-based study. *Behavioural Brain Research*. 2021/09/24/ 2021;414:113510. doi:<https://doi.org/10.1016/j.bbr.2021.113510>
