# Supplementary material for: Flavonoid-Rich Foods, Dementia Risk, and Interactions With Genetic Risk, Hypertension, and Depression
Source: PubMed Central journal article supplement (PMC11411383; doi:10.1001/jamanetworkopen.2024.34136), 2024-09-18
Supplement: jamanetwopen-e2434136-s002.pdf [file jamanetwopen-e2434136-s002.pdf]

## Data Sharing Statement

Jennings. Flavonoid-Rich Foods, Dementia Risk, and Interactions With Genetic Risk, Hypertension, and Depression. *JAMA Netw Open*. Published September 18, 2024.  
doi:10.1001/jamanetworkopen.2024.34136

### Data

**Data available:** No

### Additional Information

**Explanation for why data not available:** UK Biobank data can be requested by all bona fide researchers for approved projects, including replication, through <https://www.ukbiobank.ac.uk/>.
